# Supplementary material for: Innate immunity in the simplest animals – placozoans
Source: PubMed Central journal article supplement (PMC6321704; doi:10.1186/s12864-018-5377-3), 2019-01-05
Supplement: 12864_2018_5377_MOESM1_ESM.pdf [file 12864_2018_5377_MOESM1_ESM.pdf]

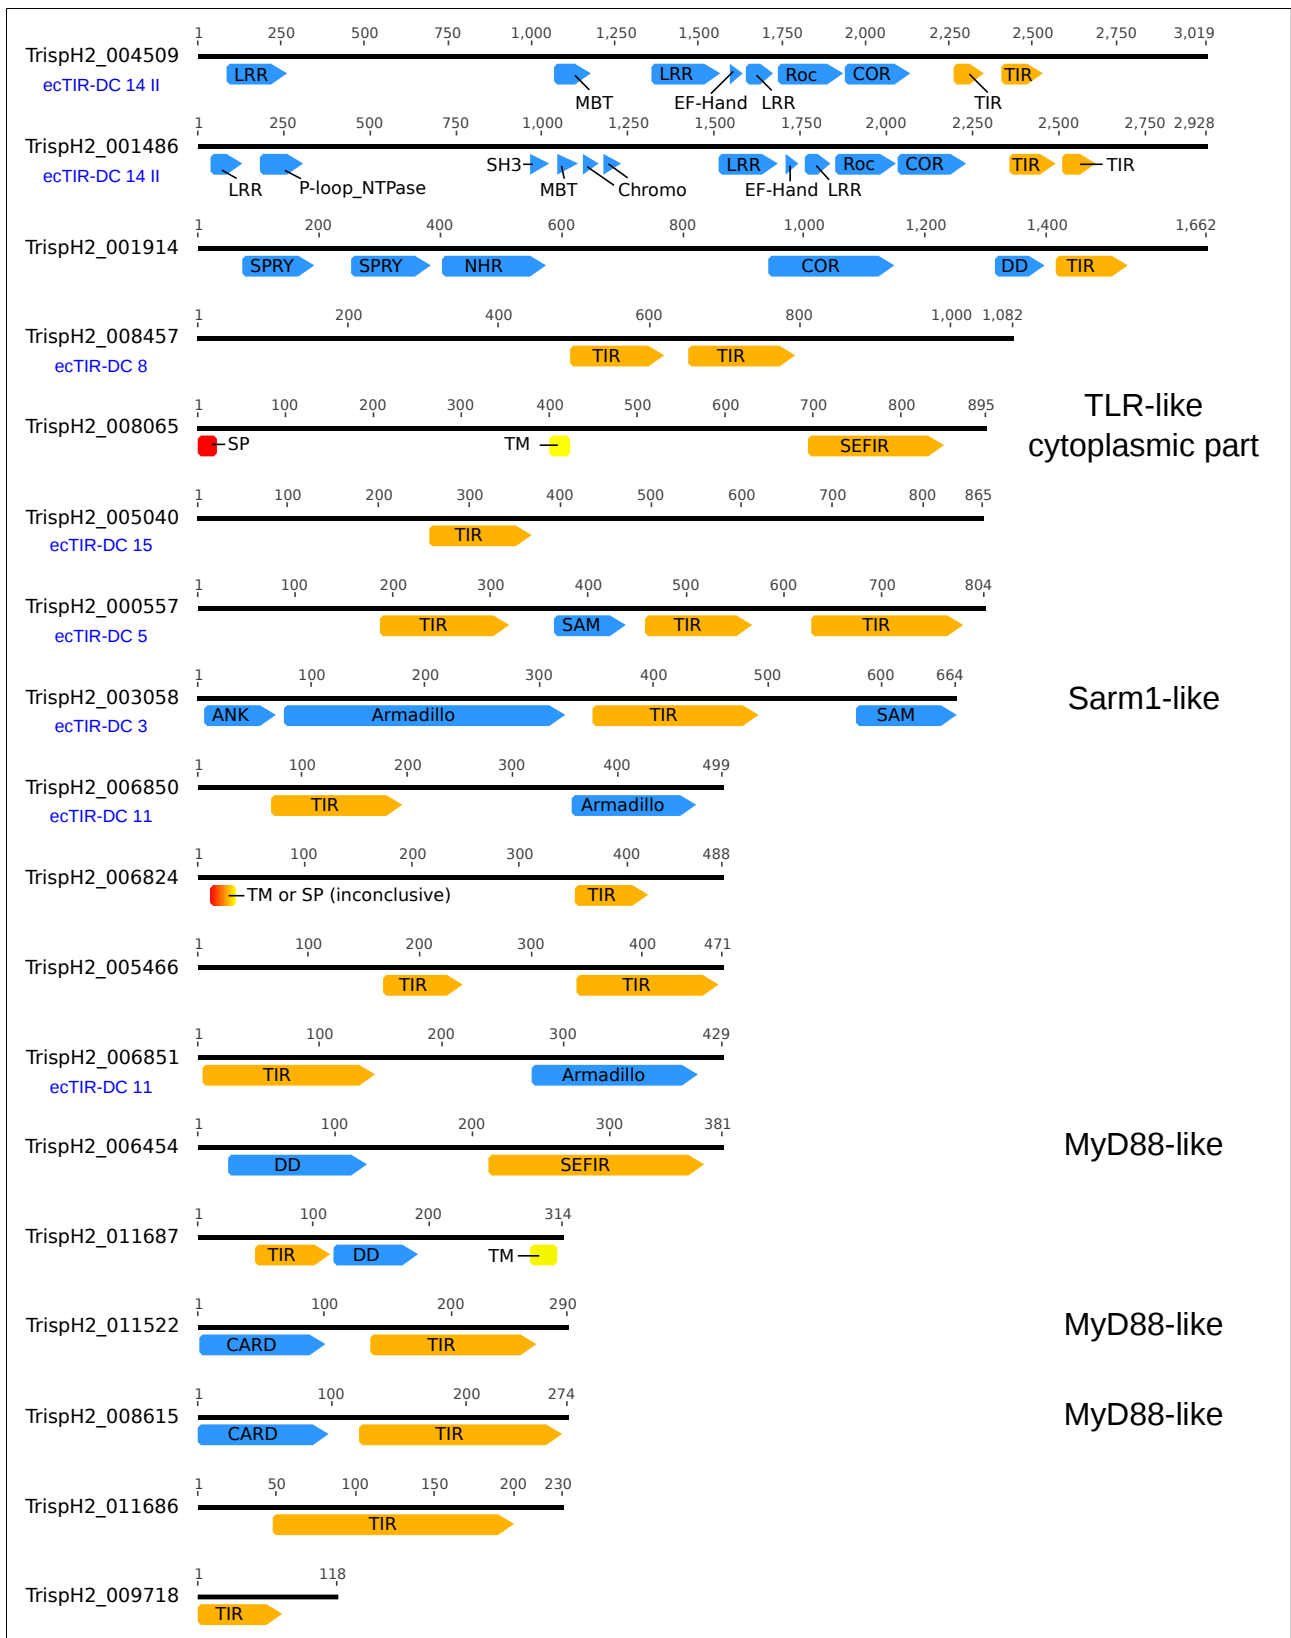

**Figure S1** TIR/SEFIR-domain containing proteins in *Trichoplax sp. H2*. True Toll-like receptors are absent. The only proteins that contain a TIR-domain and LRRs are two large proteins lacking a transmembrane domain and harboring several additional domains. Hypothetical, similar to *Hydra*, the function of the intracellular part of a TLR-receptor could be fulfilled by a transmembrane protein with a cytoplasmic TIR/SEFIR-domain that is

capable of homotypic interactions with other such domains. A possible candidate is a protein predicted to contain an SP, a TM and a cytoplasmic SEFIR-domain. The role of the intracellular adaptor (MyD88) could be fulfilled by MyD88-like proteins. Other TIR-domain containing proteins may also serve as alternative adaptors or regulators in TLR signaling. Indicated are the locus\_tags of the *Trichoplax* sp. H2 proteins. Proteins that belong to the group of the recently proposed “evolutionary conserved TIR-domain containing” (ecTIR-DC) proteins [1] are indicated by the respective family name below their locus\_tag. Shown are only IPR domains identified by InterProScan. Proteins are not drawn to scale but sorted into size classes. Domains are drawn to scale within each protein.

**Table S1** Possible candidates for the extracellular part of a hypothetical bipartite TLR-like receptor in *Trichoplax* sp. H2. These predicted proteins only contain leucine-rich-repeats (LRR) for ligand-binding and a transmembrane region. A further candidate additionally contains immunoglobulin-like domains. Analyses using HHpred revealed no further intra- or extracellular folds and that candidate genes TrispH2\_006375 and TrispH2\_011696 are most similar to bilaterian TLRs. The genes TrispH2\_009860-62 are organized in tandem in the genome.

| locus_tag      | Size (AA) | SignalP/TMHMM prediction | Phobius prediction | Prediction of LRR location (Phobius) | other domains |
|----------------|-----------|--------------------------|--------------------|--------------------------------------|---------------|
| TrispH2_000076 | 976       | SP+TM                    | SP+TM              | non-cytoplasmic                      | IG-like       |
| TrispH2_000329 | 611       |                          | TM                 | non-cytoplasmic                      |               |
| TrispH2_006375 | 650       | SP+TM                    | SP+TM              | non-cytoplasmic                      |               |
| TrispH2_009003 | 884       | TM                       | TM                 | non-cytoplasmic                      |               |
| TrispH2_009860 | 478       | SP                       | SP+TM              | non-cytoplasmic                      |               |
| TrispH2_009861 | 488       | SP                       | SP+TM              | non-cytoplasmic                      |               |
| TrispH2_009862 | 543       | SP                       | SP+TM              | non-cytoplasmic                      |               |
| TrispH2_011004 | 295       | TM                       | TM                 | non-cytoplasmic                      |               |
| TrispH2_011248 | 545       | SP                       | SP+TM              | non-cytoplasmic                      |               |
| TrispH2_011696 | 403       |                          | TM                 | non-cytoplasmic                      |               |

**Table S2** The TLR pathway related gene repertoire in *Trichoplax* sp. H2 apart from TIR-domain containing genes. Shown are BLAST, orthologous mapping and InterProScan results of the candidate genes. Placozoans clearly harbor many genes of the canonical pathway. Ambiguous orthologs are those of IRAK and NF- $\kappa$ B: Several IRAK related kinases could be found by BLAST and KEGG- or EggNOG-mapping but all of these lack a Death domain (DD). The identified NF- $\kappa$ B related gene similarly lacks a DD. Its Rel homology domain (RHD+IPT) deviates from the consensus such that it could only be identified through structural homology prediction with HHpred.

| Gene                    | locus_tag      | Swiss-Prot best hit | KEGG KO mapping | EggNOG mapping | OrthoMCL mapping    | IPR domains     | IPR family prediction | Phylogenetic assignment | remark                                                                                                                                                                    |
|-------------------------|----------------|---------------------|-----------------|----------------|---------------------|-----------------|-----------------------|-------------------------|---------------------------------------------------------------------------------------------------------------------------------------------------------------------------|
| <b>AP-1 (JUN)</b>       | TrispH2_000596 | JUN/AP-1            | K04448, JUN     | JUN            | OG5_131442, JUN     | JNK, bZIP       | Leuzip_Jun            | JUN                     |                                                                                                                                                                           |
| <b>ERK1/2 (MAPK1/3)</b> | TrispH2_001959 | MAPK1               | K04371, MAPK1/3 | MAPK3          | OG5_126781, MAPK1/3 | Protein kinase  | MAPK_ERK1/2           | MAPK1/3                 |                                                                                                                                                                           |
| <b>IKK</b>              | TrispH2_007459 | CHUK                | K04467, IKBKA   | IKBKB          | OG5_131581, IKBKB   | Protein kinase  | /                     | CHUK                    |                                                                                                                                                                           |
| <b>IRAK</b>             | TrispH2_001168 | IRAK2               | /               | ENOG410ZCW6    | OG5_142204          | Tyrosine kinase | /                     | IRAK3                   | Death domain (DD) is absent in all IRAK related kinases. The kinases with the locus_tags TrispH2_009235-009242 reside in a tight cluster of several more protein kinases. |
|                         | TrispH2_008689 | At1g01540           | K04733, IRAK4   | PELLE (IRAK4)  | OG5_135302          | Tyrosine kinase | /                     | IRAK3                   |                                                                                                                                                                           |
|                         | TrispH2_009076 | IRAK4               | /               | KOG1187        | OG5_142204          | Tyrosine kinase | /                     | IRAK3                   |                                                                                                                                                                           |
|                         | TrispH2_009235 | SD16                | /               | IRAK1          | OG5_135302          | Protein kinase  | /                     | IRAK3                   |                                                                                                                                                                           |
|                         | TrispH2_009237 | CRCK2               | /               | IRAK1          | OG5_135302          | Protein kinase  | /                     | IRAK3                   |                                                                                                                                                                           |
|                         | TrispH2_009239 | EMS1                | /               | IRAK1          | OG5_135302          | Protein kinase  | /                     | IRAK3                   |                                                                                                                                                                           |
|                         | TrispH2_009240 | IRAK4               | /               | KOG1187        | OG5_142204          | Protein kinase  | /                     | IRAK3                   |                                                                                                                                                                           |
|                         | TrispH2_009241 | IRAK4               | /               | KOG1187        | OG5_142204          | Protein kinase  | /                     | IRAK3                   |                                                                                                                                                                           |
|                         | TrispH2_009242 | MSP1                | /               | IRAK1          | OG5_135302          | Protein kinase  | /                     | IRAK3                   |                                                                                                                                                                           |
| TrispH2_010672          | IRAK4          | /                   | PELLE (IRAK4)   | /              | Tyrosine kinase     | /               | IRAK3                 |                         |                                                                                                                                                                           |
| <b>IRF</b>              | TrispH2_009842 | IRF2                | K10153, IRF2    | IRF2           | OG5_137622, IRF2    | IRF, ZU5, DD    | /                     | IRF2                    |                                                                                                                                                                           |
|                         | TrispH2_001644 | IRF1                | /               | IRF4           | OG5_137622, IRF2    | IRF             | /                     | IRF2                    |                                                                                                                                                                           |
|                         | TrispH2_003387 | IRF2                | /               | IRF4           | OG5_137622, IRF2    | IRF             | /                     | IRF2                    |                                                                                                                                                                           |
| <b>JNK (MAPK8/9/10)</b> | TrispH2_007604 | MAPK10              | K04440, JNK     | MAPK10         | OG5_129677, JNK     | Protein kinase  | MAPK_JNK              | MAPK10                  |                                                                                                                                                                           |
| <b>JSP (DUSP22)</b>     | TrispH2_000711 | DUSP22A             | K14165, DUSP    | DUSP22         | /                   | DSP             | DUSP                  | DUSP22/15               |                                                                                                                                                                           |
|                         | TrispH2_000712 | DUSP22              | K14165, DUSP    | DUSP22         | OG5_131563, DUSP    | DSP             | DUSP                  | DUSP22/15               |                                                                                                                                                                           |

|                              |                |          |                  |                       |                        |                                      |          |          |                                                                                                                                        |
|------------------------------|----------------|----------|------------------|-----------------------|------------------------|--------------------------------------|----------|----------|----------------------------------------------------------------------------------------------------------------------------------------|
| <b>MEK1/2<br/>(MAP2K1/2)</b> | TrispH2_001322 | MAP2K1   | /                | MAP2K1                | OG5_127304,<br>MEK1/2  | Protein kinase                       | /        | MAP2K1   |                                                                                                                                        |
| <b>MKK3/6<br/>(MAP2K3/6)</b> | TrispH2_004233 | MAP2K6   | K04432, MKK3     | MAP2K6                | OG5_131939,<br>MKK3/6  | Protein kinase                       | /        | MAP2K3/6 |                                                                                                                                        |
| <b>MKK4/7<br/>(MAP2K4/7)</b> | TrispH2_003417 | MAP2K4   | K04430, MKK4     | ENOG410V5YT,<br>MAP2K | OG5_133213, MKK4       | Protein kinase                       | /        | MAP2K4   |                                                                                                                                        |
|                              | TrispH2_003961 | MAP2K7   | K04431, MKK7     | MAP2K7                | OG5_133887,<br>MAP2K7  | Protein kinase                       | /        | MAP2K7   |                                                                                                                                        |
| <b>NF-κB</b>                 | TrispH2_003408 | NFKB2    | K02580,<br>NFKB1 | NFKB2                 | OG5_142327, IKBE       | ANK repeats                          | /        | NF-κB    | Derived RHD and IPT domains identified with HHpred. Two further RHD containing genes 3' in the genome (TrispH2_003409, TrispH2_003410) |
| <b>p38<br/>(MAPK11/13)</b>   | TrispH2_004732 | MAPK11   | K04441, p38      | MAPK13                | OG5_128610, p38        | Protein kinase                       | MAPK_p38 | MAPK11   |                                                                                                                                        |
| <b>Pellino</b>               | TrispH2_002428 | PELI2    | K11964, PELI     | PELI2                 | OG5_129859,<br>Pellino | Pellino                              | Pellino  | Pellino  |                                                                                                                                        |
| <b>TAB1</b>                  | TrispH2_010884 | TAB1     | K04403, TAB1     | TAB1                  | OG5_134489, TAB1       | PPM-type phosphatase                 | PP2C     | TAB1     |                                                                                                                                        |
| <b>TAK1<br/>(MAP3K7)</b>     | TrispH2_010261 | MAP3K7   | K04427, TAK1     | MAP3K7                | OG5_132679, TAK1       | Tyrosine kinase                      | /        | MAP3K7   |                                                                                                                                        |
| <b>Tollip</b>                | TrispH2_005525 | Tollip-a | K05402, Tollip   | Tollip                | OG5_134009, Tollip     | C2, CUE                              | /        | Tollip   |                                                                                                                                        |
| <b>TRAF</b>                  | TrispH2_006640 | TRAF4    | K09848,<br>TRAF4 | ENOG410V64Q,<br>TRAF  | OG5_131223, TRAF       | Znf_RING,<br>Znf_TRAF,<br>MATH/TRAF  | /        | TRAF6    |                                                                                                                                        |
|                              | TrispH2_006642 | TRAF4    | K09848,<br>TRAF4 | ENOG410V64Q,<br>TRAF  | OG5_131223, TRAF       | Znf_RING,<br>Znf_TRAF,<br>MATH/TRAF  | TRAF4    | TRAF6    |                                                                                                                                        |
|                              | TrispH2_008055 | TRAF6-a  | /                | TRAF6                 | OG5_136539, TRAF       | Znf_RING,<br>TRAF-like,<br>MATH/TRAF | TRAF6    | TRAF4    |                                                                                                                                        |

## **Additional References**

1. Gerdol M, Venier P, Edomi P, Pallavicini A. Diversity and evolution of TIR-domain-containing proteins in bivalves and Metazoa: New insights from comparative genomics. *Dev Comp Immunol.* 2017;70:145–64. doi:10.1016/j.dci.2017.01.014.
