# Supplementary material for: Innate immunity in the simplest animals – placozoans
Source: PubMed Central journal article supplement (PMC6321704; doi:10.1186/s12864-018-5377-3), 2019-01-05
Supplement: 12864_2018_5377_MOESM3_ESM.pdf [file 12864_2018_5377_MOESM3_ESM.pdf]

# TRAF – MATH/TRAF domain

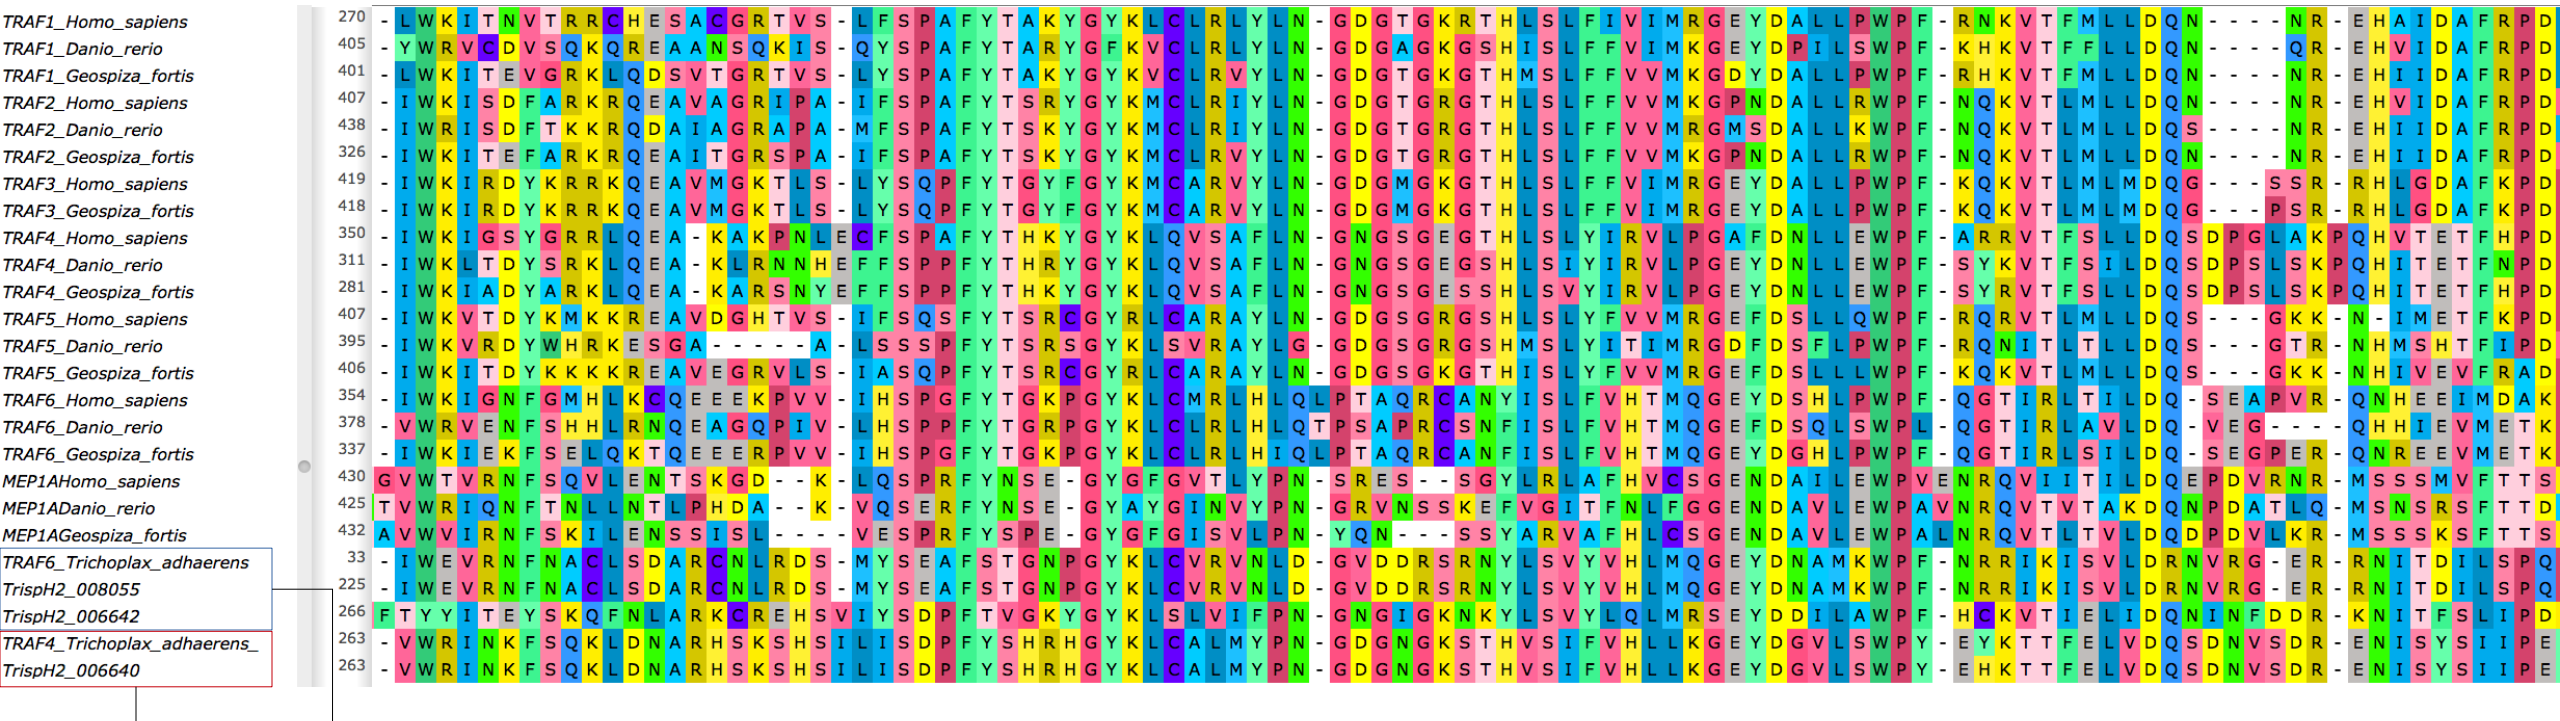

▶ TRAF6, *T. sp. H2* & *T. adhaerens*

▼ TRAF4, *T. sp. H2* & *T. adhaerens*

# IRF- IRF domain (partial)

|                               |    |   |   |   |   |   |   |   |   |   |   |   |   |   |   |   |   |   |   |   |   |   |   |   |   |   |   |   |   |   |   |   |   |   |   |   |   |   |   |   |   |   |   |   |   |   |   |   |   |   |   |   |   |   |   |   |   |   |   |   |   |   |   |   |   |   |   |   |   |   |   |   |   |   |   |   |   |   |   |   |   |   |
|-------------------------------|----|---|---|---|---|---|---|---|---|---|---|---|---|---|---|---|---|---|---|---|---|---|---|---|---|---|---|---|---|---|---|---|---|---|---|---|---|---|---|---|---|---|---|---|---|---|---|---|---|---|---|---|---|---|---|---|---|---|---|---|---|---|---|---|---|---|---|---|---|---|---|---|---|---|---|---|---|---|---|---|---|---|
| <i>IRF2_Homo_sapiens</i>      | 12 | L | E | E | Q | I | N | S | N | T | I | P | G | L | K | W | L | N | K | E | K | K | I | F | Q | I | P | W | H | A | A | R | H | G | W | D | V | E | K | D | A | P | L | F | R | N | W | A | I | H | T | G | K | H | Q | P | G | V | D | K | P | D | P | K | T | W | K | A | N | F | R | C | A | M | N | S | L | P | D | I |   |   |
| <i>IRF2_Danio_gerio</i>       | 12 | L | E | E | Q | I | N | S | C | Q | I | P | G | L | K | W | V | N | K | E | K | R | I | F | Q | I | P | W | H | A | A | R | H | G | W | D | V | E | K | D | A | P | L | F | R | N | W | A | I | H | T | G | K | Y | Q | P | G | - | D | K | P | D | P | K | T | W | K | A | N | F | R | C | A | M | N | S | L | P | D | I |   |   |
| <i>IRF2_Geospiza_fortis</i>   | 12 | L | E | E | Q | I | N | S | N | R | I | P | G | L | K | W | L | N | K | E | K | K | I | F | Q | I | P | W | H | A | A | R | H | G | W | D | V | E | K | D | A | P | L | F | R | N | W | A | I | H | T | G | K | Y | Q | S | G | V | D | K | P | D | P | K | T | W | K | A | N | F | R | C | A | M | N | S | L | P | D | I |   |   |
| <i>IRF3_Homo_sapiens</i>      | 12 | L | V | S | Q | L | D | L | G | Q | L | E | G | V | A | W | V | N | K | S | R | T | R | F | R | I | P | W | K | H | G | L | R | Q | D | A | Q | - | Q | E | D | F | G | I | F | Q | A | W | A | E | A | T | G | A | Y | V | P | G | R | D | K | P | D | L | P | T | W | K | R | N | F | R | S | A | L | N | R | K | E | G | L |   |
| <i>IRF3_Takifuqu_rubripes</i> | 22 | L | I | E | Q | V | D | C | G | K | Y | P | G | L | V | W | E | N | D | E | K | S | I | F | R | I | P | W | K | H | A | G | K | Q | D | Y | N | R | D | E | D | A | A | L | F | K | A | W | A | L | F | K | G | K | F | R | E | G | I | D | K | P | D | P | P | T | W | K | T | R | L | R | C | A | L | N | K | S | N | D | F |   |
| <i>IRF4_Homo_sapiens</i>      | 70 | L | I | D | Q | I | D | S | G | K | Y | P | G | L | V | W | E | N | D | E | K | S | I | F | R | I | P | W | K | H | A | G | K | Q | D | Y | N | R | D | E | D | A | A | L | F | K | A | W | A | L | F | K | G | K | F | R | E | G | I | D | K | P | D | P | P | T | W | K | T | R | L | R | C | A | L | N | K | S | N | D | F |   |
| <i>IRF4_Danio_gerio</i>       | 22 | L | I | E | Q | I | D | S | G | E | Y | S | G | L | V | W | E | N | D | E | K | T | I | F | R | I | P | W | K | H | A | G | K | Q | D | Y | N | R | D | E | D | A | A | L | F | K | A | W | A | L | F | K | G | K | Y | R | E | G | L | D | K | P | D | P | P | T | W | K | T | R | L | R | C | A | L | N | K | S | N | D | F |   |
| <i>IRF4_Geospiza_fortis</i>   | 34 | L | I | D | Q | I | D | S | G | K | Y | P | G | L | V | W | E | N | D | E | K | S | I | F | R | I | P | W | K | H | A | G | K | Q | D | Y | N | R | D | E | D | A | A | L | F | K | A | W | A | L | F | K | G | K | F | R | E | G | I | D | K | P | D | P | P | T | W | K | T | R | L | R | C | A | L | N | K | S | N | D | F |   |
| <i>IRF5_Homo_sapiens</i>      | 45 | L | V | A | Q | V | N | S | C | Q | Y | P | G | L | Q | W | V | N | G | E | K | K | L | F | C | I | P | W | R | H | A | T | R | H | G | P | S | Q | D | G | D | N | T | I | F | K | A | W | A | K | E | T | G | K | Y | T | E | G | V | D | E | A | D | P | A | K | W | K | A | N | L | R | C | A | L | N | K | S | R | D | F |   |
| <i>IRF5_Danio_gerio</i>       | 14 | L | L | A | Q | I | N | S | G | K | Y | P | G | L | H | W | L | N | Q | E | R | R | L | F | R | I | P | W | R | H | A | T | R | H | M | P | T | L | E | E | E | N | T | I | F | K | A | W | A | L | E | T | G | K | Y | Q | E | G | I | D | E | P | D | P | A | K | W | K | A | N | L | R | C | A | L | N | K | S | R | E | F |   |
| <i>IRF6_Homo_sapiens</i>      | 14 | L | V | A | Q | V | D | S | G | L | Y | P | G | L | I | W | L | H | R | D | S | K | R | F | Q | I | P | W | K | H | A | T | R | H | S | P | Q | Q | E | E | E | N | T | I | F | K | A | W | A | V | E | T | G | K | Y | Q | E | G | V | D | D | P | D | P | A | K | W | K | A | Q | L | R | C | A | L | N | K | S | R | E | F |   |
| <i>IRF6_Danio_gerio</i>       | 14 | L | V | S | Q | V | D | N | A | T | F | P | G | L | V | W | L | D | R | D | A | K | R | F | Q | I | P | W | K | H | A | T | R | H | T | P | Q | Q | E | E | E | N | T | I | F | K | A | W | A | V | E | T | G | K | Y | Q | E | G | V | D | E | P | D | P | A | K | W | K | A | Q | L | R | C | A | L | N | K | S | R | E | F |   |
| <i>IRF7_Homo_sapiens</i>      | 31 | L | L | G | E | I | S | S | G | C | Y | E | G | L | Q | W | L | D | E | A | R | T | C | F | R | V | P | W | K | H | F | A | R | K | D | L | S | - | E | A | D | A | R | I | F | K | A | W | A | V | A | R | G | R | W | P | E | A | - | E | T | A | E | R | A | G | W | K | T | N | F | R | C | A | L | R | S | T | R | R | F |   |
| <i>IRF7_Danio_gerio</i>       | 14 | L | I | E | Q | V | E | S | G | Q | Y | E | G | L | S | M | I | - | - | G | H | D | I | F | R | I | P | W | K | H | N | A | R | R | D | L | G | - | D | A | D | V | K | I | F | K | E | W | A | I | V | S | G | K | I | N | E | Y | - | - | P | N | D | K | A | K | W | K | T | N | F | R | C | A | L | H | S | L | K | S | F |   |
| <i>IRF7_Geospiza_fortis</i>   | 96 | G | A | V | N | A | I | N | S | G | S | Y | R | G | L | R | W | I | D | S | A | H | T | I | F | R | V | P | W | K | H | N | A | R | K | D | I | T | - | S | S | D | L | E | V | F | K | G | W | A | K | V | S | G | R | Y | E | E | G | - | - | S | E | D | P | A | K | W | K | T | N | F | R | C | A | L | S | S | T | H | L | F |
| <i>IRF8_Homo_sapiens</i>      | 14 | L | I | E | Q | I | D | S | S | M | Y | P | G | L | I | W | E | N | E | E | K | S | M | F | R | I | P | W | K | H | A | G | K | Q | D | Y | N | Q | E | V | D | A | S | I | F | K | A | W | A | V | F | K | G | K | F | K | E | G | - | D | K | A | E | P | A | T | W | K | T | R | L | R | C | A | L | N | K | S | P | D | F |   |
| <i>IRF8_Danio_gerio</i>       | 12 | L | I | E | Q | I | N | S | N | I | Y | N | G | L | Q | W | E | D | E | D | R | T | M | F | R | I | P | W | K | H | A | G | K | Q | D | Y | N | Q | E | V | D | A | S | I | F | K | A | W | A | I | F | K | G | K | F | K | E | G | - | D | K | A | E | P | A | T | W | K | T | R | L | R | C | A | L | N | K | S | P | D | F |   |
| <i>IRF8_Geospiza_fortis</i>   | 14 | L | I | E | Q | I | D | S | E | L | Y | A | G | L | I | W | E | N | E | D | K | S | M | F | R | I | P | W | K | H | A | G | K | Q | D | Y | N | Q | E | V | D | A | S | I | F | K | A | W | A | V | F | K | G | K | F | K | E | G | - | D | K | A | E | P | A | T | W | K | T | R | L | R | C | A | L | N | K | S | P | D | F |   |
| <i>IRF9_Homo_sapiens</i>      | 16 | V | V | E | Q | V | E | S | G | Q | F | P | G | V | C | W | D | D | T | A | K | T | M | F | R | I | P | W | K | H | A | G | K | Q | D | F | R | E | D | Q | D | A | A | F | F | K | A | W | A | I | F | K | G | K | Y | K | E | G | - | D | T | G | G | P | A | V | W | K | T | R | L | R | C | A | L | N | K | S | S | E | F |   |
| <i>IRF9_Geospiza_fortis</i>   | 14 | L | I | E | Q | I | D | S | E | L | Y | A | G | L | I | W | E | N | E | D | K | S | M | F | R | I | P | W | K | H | A | G | K | Q | D | Y | N | Q | E | V | D | A | S | I | F | K | A | W | A | V | F | K | G | K | F | K | E | G | - | D | K | A | E | P | A | T | W | K | T | R | L | R | C | A | L | N | K | S | P | D | F |   |
| <i>Trichoplax_adhaerens</i>   | 11 | I | K | E | K | L | E | A | R | T | I | P | G | L | E | Y | I | D | R | D | K | M | V | F | R | I | P | W | K | H | G | A | K | Q | G | Y | Q | I | E | T | D | G | V | I | Y | V | E | W | A | K | V | T | N | K | Y | S | K | - | - | Y | Y | N | K | P | N | V | W | K | T | N | F | R | C | A | I | N | S | L | P | D | V |   |
| <i>TrispH2_009842</i>         | 56 | L | E | E | K | I | T | A | Q | A | I | P | G | L | C | W | M | D | K | E | N | K | I | F | R | I | P | W | K | H | A | A | R | Q | G | W | S | V | D | E | D | A | S | L | F | R | A | W | A | I | H | T | G | K | F | S | P | D | R | D | E | P | K | P | K | V | W | K | A | N | F | R | C | A | L | N | S | L | H | D | V |   |
| <i>TrispH2_001644</i>         | 11 | I | K | E | K | L | E | A | R | T | I | P | G | L | E | Y | I | D | R | D | K | M | V | F | R | I | P | W | K | H | G | A | K | Q | G | Y | Q | I | E | T | D | G | V | I | Y | V | E | W | A | K | V | T | N | K | Y | S | K | - | - | Y | Y | N | K | P | N | V | W | K | T | N | F | R | C | A | I | N | S | L | P | D | V |   |
| <i>TrispH2_003387</i>         | 10 | L | K | E | I | L | E | E | N | A | V | E | G | I | H | Y | V | N | G | S | K | D | T | F | A | I | K | W | V | H | A | S | N | K | S | Y | D | P | D | C | H | G | A | I | F | K | R | W | M | K | K | S | R | K | L | D | K | - | - | Y | K | S | N | Y | S | M | W | K | T | N | F | R | C | A | I | N | S | L | P | D | V |   |

IRF, *T. sp. H2* & *T. adhaerens*

# IKK (Pkinase domain, partial)

→ ULK (Unc-51-like kinase) family

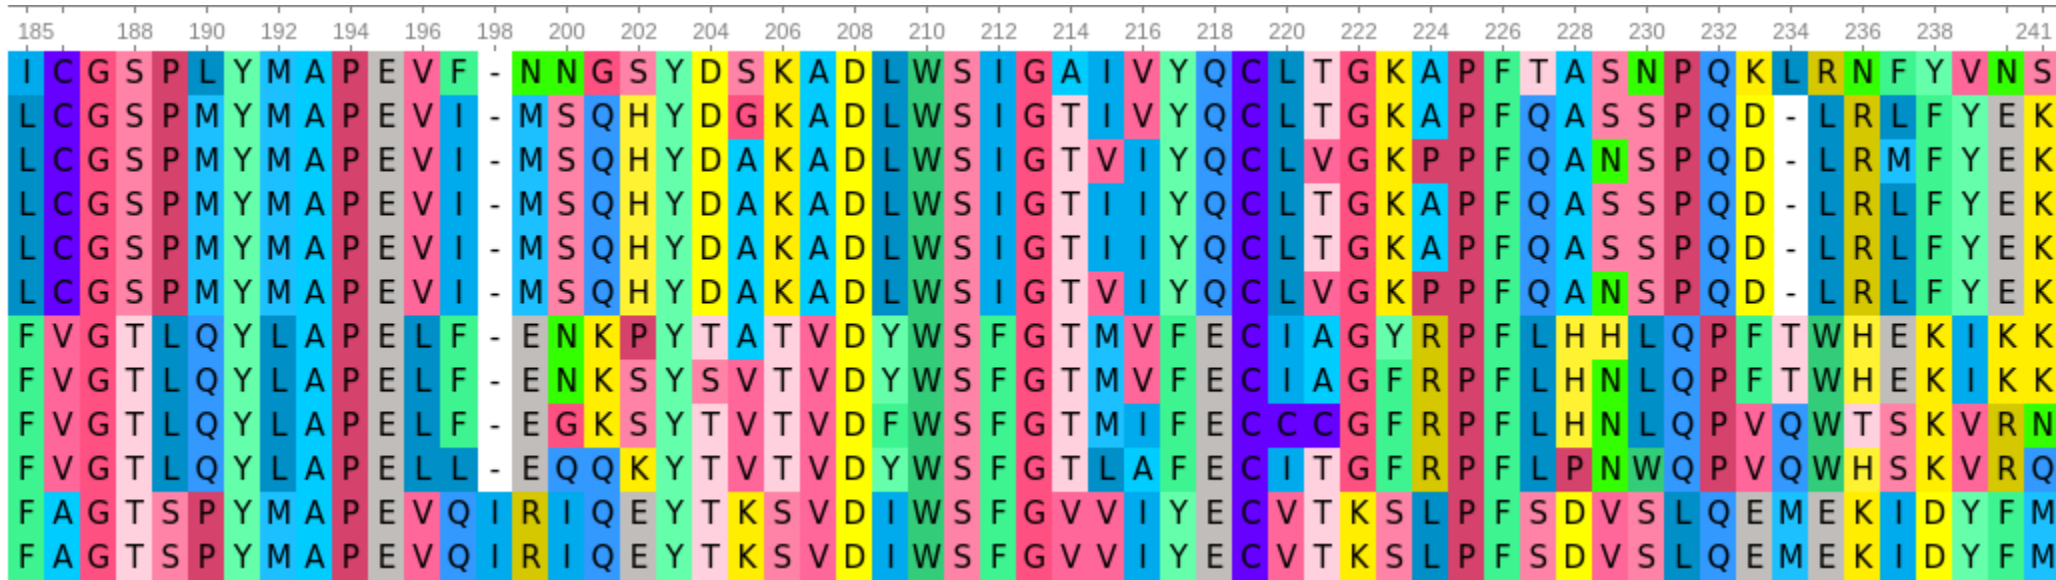

→ IKK (Inhibitor of nuclear factor kappa-B kinase) family



# JUN/FOS (bZIP domain )

*JUN\_Homo\_sapiens*

*JUN\_Danio\_erio*

*JUN\_Geospiza\_fortis*

*FOS\_Homo\_sapiens*

*FOS\_Danio\_erio*

*Trichoplax\_adhaerens*

*TrispH\_000596*

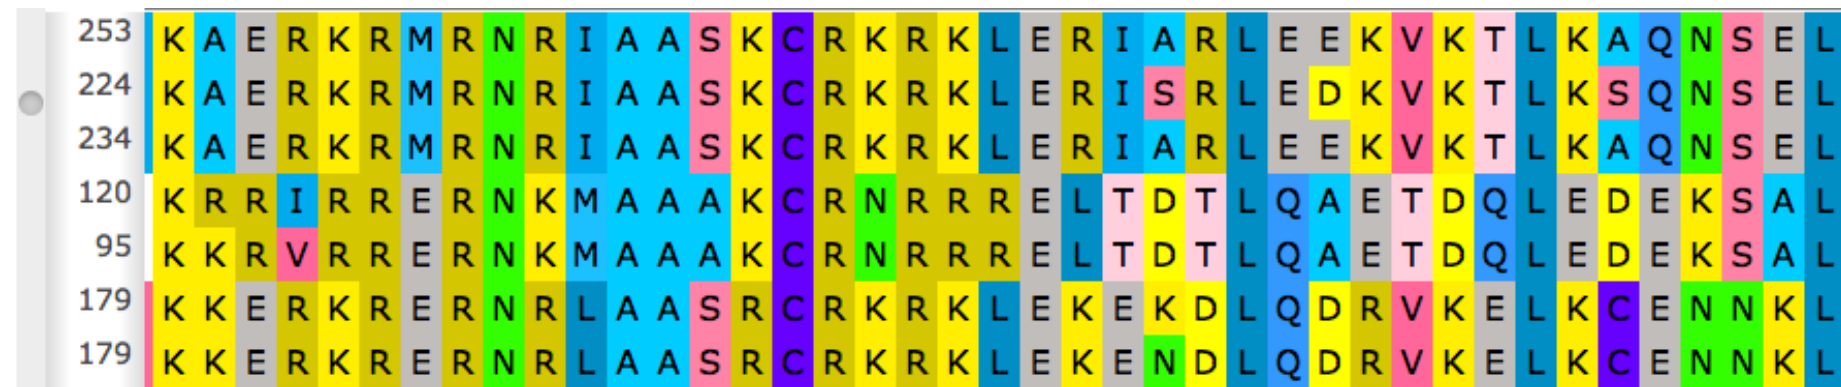

JUN, *T. sp. H2* & *T. adhaerens*

# MAP2K (Pkinase domain, partial)

|                               |     |   |   |   |   |   |   |   |   |   |   |   |   |   |   |   |   |   |   |   |   |   |   |   |   |   |   |   |   |   |   |   |   |   |   |   |   |   |   |   |   |   |   |   |   |   |   |   |   |   |   |   |   |   |   |   |   |   |   |   |   |   |   |   |   |   |   |   |   |   |   |   |   |
|-------------------------------|-----|---|---|---|---|---|---|---|---|---|---|---|---|---|---|---|---|---|---|---|---|---|---|---|---|---|---|---|---|---|---|---|---|---|---|---|---|---|---|---|---|---|---|---|---|---|---|---|---|---|---|---|---|---|---|---|---|---|---|---|---|---|---|---|---|---|---|---|---|---|---|---|---|
| <i>MAP2K1_Homo_sapiens</i>    | 160 | I | P | E | Q | I | L | G | K | V | S | I | A | V | I | K | G | L | T | Y | L | R | E | K | H | K | I | M | H | R | D | V | K | P | S | N | I | L | V | N | S | R | G | E | I | K | L | C | D | F | G | V | S | G | Q | L | I | D | S | M | A | N | S | F | - | V | G | T | R | S | Y | M | S |
| <i>MAP2K1_Danio_rio</i>       | 161 | I | P | E | Q | I | L | G | K | V | S | I | A | V | I | K | G | L | S | Y | L | R | E | K | H | K | I | M | H | R | D | V | K | P | S | N | I | L | V | N | S | R | G | E | I | K | L | C | D | F | G | V | S | G | Q | L | I | D | S | M | A | N | S | F | - | V | G | T | R | S | Y | M | S |
| <i>MAP2K1_Geospiza_fortis</i> | 154 | I | P | E | Q | I | L | G | K | V | S | I | A | V | I | K | G | L | T | Y | L | R | E | K | H | K | I | M | H | R | D | V | K | P | S | N | I | L | V | N | S | R | G | E | I | K | L | C | D | F | G | V | S | G | Q | L | I | D | S | M | A | N | S | F | - | V | G | T | R | S | Y | M | S |
| <i>MAP2K2_Homo_sapiens</i>    | 164 | I | P | E | E | I | L | G | K | V | S | I | A | V | L | R | G | L | A | Y | L | R | E | K | H | Q | I | M | H | R | D | V | K | P | S | N | I | L | V | N | S | R | G | E | I | K | L | C | D | F | G | V | S | G | Q | L | I | D | S | M | A | N | S | F | - | V | G | T | R | S | Y | M | S |
| <i>MAP2K2_Danio_rio</i>       | 161 | I | P | E | E | I | L | G | K | V | S | I | A | V | L | R | G | L | A | Y | L | R | E | K | H | Q | I | M | H | R | D | V | K | P | S | N | I | L | V | N | S | R | G | E | I | K | L | C | D | F | G | V | S | G | Q | L | I | D | S | M | A | N | S | F | - | V | G | T | R | S | Y | M | S |
| <i>MAP2K2_Geospiza_fortis</i> | 141 | I | P | E | E | I | L | G | K | V | S | I | A | V | L | R | G | L | A | Y | L | R | E | K | H | Q | I | M | H | R | D | V | K | P | S | N | I | L | V | N | S | R | G | E | I | K | L | C | D | F | G | V | S | G | Q | L | I | D | S | M | A | N | S | F | - | V | G | T | R | S | Y | M | S |
| <i>MAP2K3_Homo_sapiens</i>    | 131 | I | P | E | D | I | L | G | E | I | A | V | S | I | V | R | A | L | E | H | L | H | S | K | L | S | V | I | H | R | D | V | K | P | S | N | V | L | I | N | K | E | G | H | V | K | M | C | D | F | G | I | S | G | Y | L | V | D | S | V | A | K | T | M | D | A | G | C | K | P | Y | M | A |
| <i>MAP2K3_Danio_rio</i>       | 176 | I | P | E | D | I | L | G | K | I | T | V | S | I | V | K | A | L | E | H | L | H | S | N | L | S | V | I | H | R | D | V | K | P | S | N | V | L | I | N | M | Q | G | Q | V | K | M | C | D | F | G | I | S | G | Y | L | V | D | S | V | A | K | T | M | D | A | G | C | K | P | Y | M | A |
| <i>MAP2K3_Geospiza_fortis</i> | 161 | I | P | E | D | I | L | G | K | M | A | V | S | I | V | R | A | L | E | H | L | H | S | K | L | S | V | I | H | R | D | V | K | P | S | N | V | L | I | N | K | E | G | H | V | K | M | C | D | F | G | I | S | G | Y | L | V | D | S | V | A | K | T | M | D | A | G | C | K | P | Y | M | A |
| <i>MAP2K4_Homo_sapiens</i>    | 227 | I | P | E | E | I | L | G | K | I | T | L | A | T | V | K | A | L | N | H | L | K | E | N | L | K | I | I | H | R | D | I | K | P | S | N | I | L | L | D | R | S | G | N | I | K | L | C | D | F | G | I | S | G | Q | L | V | D | S | I | A | K | T | R | D | A | G | C | R | P | Y | M | A |
| <i>MAP2K4_Danio_rio</i>       | 204 | I | P | E | E | I | L | G | K | I | T | L | A | T | V | K | A | L | N | H | L | K | E | N | L | K | I | I | H | R | D | I | K | P | S | N | I | L | L | D | R | K | G | N | I | K | L | C | D | F | G | I | S | G | Q | L | V | D | S | I | A | K | T | R | D | A | G | C | R | P | Y | M | A |
| <i>MAP2K4_Geospiza_fortis</i> | 159 | I | P | E | E | I | L | G | K | I | T | L | A | T | V | K | A | L | N | H | L | K | E | N | L | K | I | I | H | R | D | I | K | P | S | N | I | L | L | D | R | N | G | N | I | K | L | C | D | F | G | I | S | G | Q | L | V | D | S | I | A | K | T | R | D | A | G | C | R | P | Y | M | A |
| <i>MAP2K5_Homo_sapiens</i>    | 255 | M | P | E | H | V | L | G | R | I | A | V | A | V | V | K | G | L | T | Y | L | W | S | - | L | K | I | L | H | R | D | V | K | P | S | N | M | L | V | N | T | R | G | Q | V | K | L | C | D | F | G | V | S | T | Q | L | V | N | S | I | A | K | T | Y | - | V | G | T | N | A | Y | M | A |
| <i>MAP2K5_Danio_rio</i>       | 254 | I | P | E | H | V | L | G | R | I | A | V | A | V | V | K | G | L | T | Y | L | W | S | - | L | K | I | L | H | R | D | V | K | P | S | N | M | L | V | N | T | R | G | Q | V | K | L | C | D | F | G | V | S | T | Q | L | V | N | S | I | A | K | T | Y | - | V | G | T | N | A | Y | M | A |
| <i>MAP2K5_Geospiza_fortis</i> | 204 | I | P | E | H | V | L | G | R | I | A | V | A | V | V | K | G | L | T | Y | L | W | S | - | L | K | I | L | H | R | D | V | K | P | S | N | M | L | V | N | T | R | G | Q | V | K | L | C | D | F | G | V | S | T | Q | L | V | N | S | I | A | K | T | Y | - | V | G | T | N | A | Y | M | A |
| <i>MAP2K6_Homo_sapiens</i>    | 149 | I | P | E | D | I | L | G | K | I | A | V | S | I | V | K | A | L | E | H | L | H | S | K | L | S | V | I | H | R | D | V | K | P | S | N | V | L | I | N | A | L | G | Q | V | K | M | C | D | F | G | I | S | G | Y | L | V | D | S | V | A | K | T | I | D | A | G | C | K | P | Y | M | A |
| <i>MAP2K6_Danio_rio</i>       | 176 | I | P | E | D | I | L | G | K | I | T | V | S | I | V | K | A | L | E | H | L | H | S | N | L | S | V | I | H | R | D | V | K | P | S | N | V | L | I | N | M | Q | G | Q | V | K | M | C | D | F | G | I | S | G | Y | L | V | D | S | V | A | K | T | M | D | A | G | C | K | P | Y | M | A |
| <i>MAP2K6_Geospiza_fortis</i> | 149 | I | P | E | D | I | L | G | K | I | A | V | S | I | V | K | A | L | E | H | L | H | S | K | L | S | V | I | H | R | D | V | K | P | S | N | V | L | I | N | T | Q | G | Q | V | K | M | C | D | F | G | I | S | G | Y | L | V | D | S | V | A | K | T | M | D | A | G | C | K | P | Y | M | A |
| <i>MAP2K7_Homo_sapiens</i>    | 255 | I | P | E | R | I | L | G | K | M | T | V | A | I | V | K | A | L | Y | Y | L | K | E | K | H | G | V | I | H | R | D | V | K | P | S | N | I | L | L | D | E | R | G | Q | I | K | L | C | D | F | G | I | S | G | R | L | V | D | S | K | A | K | T | R | S | A | G | C | A | A | Y | M | A |
| <i>MAP2K7_Danio_rio</i>       | 220 | I | P | E | A | I | L | G | K | M | T | V | A | I | V | N | A | L | L | Y | L | K | E | K | H | G | V | I | H | R | D | V | K | P | S | N | I | L | L | D | A | K | G | Q | I | K | L | C | D | F | G | I | S | G | R | L | V | D | S | K | A | K | T | R | S | A | G | C | A | A | Y | M | A |
| <i>TA_XP_002109884.1</i>      | 122 | I | P | E | D | I | L | G | K | I | T | V | A | V | V | K | A | L | H | Y | L | K | Q | N | H | G | V | I | H | R | D | V | K | P | S | N | I | L | L | D | A | D | G | N | V | K | L | C | D | F | G | I | S | G | R | L | V | D | S | K | A | R | T | R | G | K | G | C | A | A | Y | M | S |
| <i>TrispH2_003961</i>         | 195 | I | P | E | D | I | L | G | K | I | T | V | A | V | V | K | A | L | H | Y | L | K | Q | N | H | G | V | I | H | R | D | V | K | P | S | N | I | L | L | D | A | D | G | N | V | K | L | C | D | F | G | I | S | G | R | L | V | D | S | K | A | R | T | R | G | K | G | C | A | A | Y | M | S |
| <i>TA_XP_002109167.1</i>      | 103 | F | N | E | A | I | L | C | Y | F | A | N | C | V | I | K | A | L | S | Y | L | H | N | K | L | K | V | I | H | R | D | V | K | P | S | N | I | L | L | D | L | N | G | L | V | K | L | C | D | F | G | I | S | G | Q | L | V | N | S | I | A | K | T | R | E | A | G | C | K | P | Y | M | A |
| <i>TrispH2_004233</i>         | 420 | F | N | E | P | I | L | C | Y | F | A | N | C | V | I | K | A | L | S | Y | L | H | N | K | L | K | V | I | H | R | D | V | K | P | S | N | I | L | L | D | L | N | G | L | V | K | L | C | D | F | G | I | S | G | Q | L | V | N | S | I | A | K | T | R | E | A | G | C | K | P | Y | M | A |
| <i>TA_XP_002109210.1</i>      | 105 | F | P | E | D | F | L | G | K | I | S | V | A | V | V | R | A | L | N | Y | L | K | T | E | L | N | I | I | H | R | D | V | K | P | S | N | I | L | L | D | D | N | G | N | V | K | L | C | D | F | G | I | S | G | K | L | V | D | S | I | A | K | T | R | D | A | G | C | R | P | Y | M | A |
| <i>TrispH2_003417</i>         | 157 | F | P | E | D | F | L | G | K | I | S | V | A | V | V | R | A | L | N | Y | L | K | T | E | L | N | I | I | H | R | D | V | K | P | S | N | I | L | L | D | D | N | G | N | V | K | L | C | D | F | G | I | S | G | K | L | V | D | S | I | A | K | T | R | D | A | G | C | R | P | Y | M | A |
| <i>TA_XP_002110508.1</i>      | 164 | I | P | E | P | I | L | G | K | I | A | I | A | V | I | K | G | L | T | Y | L | R | E | K | H | K | I | M | H | R | D | V | K | P | S | N | I | L | V | N | S | R | G | E | I | K | M | C | D | F | G | V | S | G | Q | L | I | D | S | M | A | N | S | F | - | V | G | T | R | S | Y | M | S |
| <i>TrispH2_001322</i>         | 172 | I | P | E | P | I | L | G | K | I | A | I | A | V | I | K | G | L | T | Y | L | R | E | K | H | K | I | M | H | R | D | V | K | P | S | N | I | L | V | N | S | R | G | E | I | K | M | C | D | F | G | V | S | G | Q | L | I | D | S | M | A | N | S | F | - | V | G | T | R | S | Y | M | S |

MAP2K, *T. sp. H2* & *T. adhaerens*

# MAP3K (Pkinase domain, partial)

|                      |   |   |   |   |   |   |   |   |   |   |   |   |   |   |   |   |   |   |   |   |   |   |   |   |   |   |   |   |   |   |   |   |   |   |   |   |   |
|----------------------|---|---|---|---|---|---|---|---|---|---|---|---|---|---|---|---|---|---|---|---|---|---|---|---|---|---|---|---|---|---|---|---|---|---|---|---|---|
| MAP3K1_Homo_sapiens  | V | I | N | Y | T | E | Q | L | L | R | G | L | S | Y | L | H | E | N | Q | - | - | - | I | I | H | R | D | V | K | G | A | N | L | L | I | D | S |
| MAKP3K1_Danio_erio   | I | I | N | Y | T | E | Q | L | L | R | G | L | A | Y | L | H | E | N | Q | - | - | - | I | I | H | R | D | I | K | G | A | N | L | L | I | D | S |
| MAP3K2_Homo_sapiens  | T | R | K | Y | T | R | Q | I | L | E | G | V | H | Y | L | H | S | N | M | - | - | - | I | V | H | R | D | I | K | G | A | N | I | L | R | D | S |
| MAP3K2_Danio_erio    | T | R | K | Y | T | R | Q | I | L | E | G | V | C | Y | L | H | S | N | M | - | - | - | I | V | H | R | D | I | K | G | A | N | I | L | R | D | S |
| MAP3K3_Homo_sapiens  | T | R | K | Y | T | R | Q | I | L | E | G | M | S | Y | L | H | S | N | M | - | - | - | I | V | H | R | D | I | K | G | A | N | I | L | R | D | S |
| MAP3K3_Danio_erio    | T | R | K | Y | T | R | Q | I | L | E | G | M | S | Y | L | H | S | N | M | - | - | - | I | V | H | R | D | I | K | G | A | N | I | L | R | D | S |
| MAP3K4_Homo_sapiens  | I | R | L | Y | S | K | Q | I | T | I | A | I | N | V | L | H | E | H | G | - | - | - | I | V | H | R | D | I | K | G | A | N | I | F | L | T | S |
| MAP3K4_Danio_erio    | I | R | L | Y | S | K | Q | I | T | T | A | I | N | V | L | H | E | H | G | - | - | - | I | V | H | R | D | I | K | G | A | N | I | F | L | T | S |
| MAP3K5_Homo_sapiens  | I | G | F | Y | T | K | Q | I | L | E | G | L | K | Y | L | H | D | N | Q | - | - | - | I | V | H | R | D | I | K | G | D | N | V | L | I | N | T |
| MAP3K5_Danio_erio    | I | G | F | Y | T | K | Q | I | L | D | G | L | K | Y | L | H | D | N | Q | - | - | - | I | V | H | R | D | I | K | G | D | N | V | L | I | N | T |
| MAP3K6_Homo_sapiens  | I | S | F | Y | T | R | Q | I | L | Q | G | L | G | Y | L | H | D | N | H | - | - | - | I | V | H | R | D | I | K | G | D | N | V | L | I | N | T |
| MAP3K6_Danio_erio    | I | G | F | Y | T | K | Q | I | L | D | G | L | K | Y | L | H | D | N | Q | - | - | - | I | V | H | R | D | I | K | G | D | N | V | L | I | N | T |
| MAP3K7_Homo_sapiens  | A | M | S | W | C | L | Q | C | S | Q | G | V | A | Y | L | H | S | M | Q | P | K | A | L | I | H | R | D | L | K | P | P | N | L | L | L | V | A |
| MAP3K7_Danio_erio    | A | M | S | W | C | L | Q | C | S | Q | G | V | S | Y | L | H | G | M | K | P | K | A | L | I | H | R | D | L | K | P | P | N | L | L | L | V | A |
| MAP3K8_Homo_sapiens  | I | I | W | V | T | K | H | V | L | K | G | L | D | F | L | H | S | K | K | - | - | - | V | I | H | H | D | I | K | P | S | N | I | V | F | M | S |
| MAP3K8_Danio_erio    | I | I | W | V | S | Q | Q | V | L | R | G | L | E | Y | L | H | S | H | N | - | - | - | I | I | H | H | D | I | K | P | S | N | I | V | L | M | S |
| MAP3K9_Homo_sapiens  | L | V | N | W | A | V | Q | I | A | R | G | M | N | Y | L | H | D | E | A | I | V | P | I | I | H | R | D | L | K | S | S | N | I | L | I | L | Q |
| MAP3K9_Danio_erio    | L | V | D | W | A | V | Q | I | A | R | A | M | L | Y | L | H | C | Q | A | I | V | P | V | I | H | R | D | L | K | S | S | N | I | L | I | L | E |
| MAP3K10_Homo_sapiens | L | V | N | W | A | V | Q | V | A | R | G | M | N | Y | L | H | N | D | A | P | V | P | I | I | H | R | D | L | K | S | I | N | I | L | I | L | E |
| MAP3K10_Danio_erio   | L | V | N | W | A | V | Q | I | A | T | G | M | D | Y | L | H | N | Q | T | F | V | P | I | I | H | R | D | L | K | S | S | N | I | L | I | L | E |
| MAP3K11_Homo_sapiens | L | V | N | W | A | V | Q | I | A | R | G | M | H | Y | L | H | C | E | A | L | V | P | V | I | H | R | D | L | K | S | N | N | I | L | L | L | Q |
| MAP3K11_Danio_erio   | L | V | N | W | A | V | Q | I | A | R | G | M | L | Y | L | H | S | E | A | I | V | P | V | I | H | R | D | L | K | S | N | N | I | L | L | A | E |
| MAP3K12_Homo_sapiens | L | V | D | W | S | M | G | I | A | G | G | M | N | Y | L | H | L | H | K | - | - | - | I | I | H | R | D | L | K | S | P | N | M | L | I | T | Y |
| MAP3K12_Danio_erio   | L | V | D | W | A | M | G | I | A | G | G | M | N | Y | L | H | L | H | K | - | - | - | I | I | H | R | D | L | K | S | P | N | M | L | I | T | H |
| MAP3K13_Homo_sapiens | L | V | D | W | S | T | G | I | A | S | G | M | N | Y | L | H | L | H | K | - | - | - | I | I | H | R | D | L | K | S | P | N | V | L | V | T | H |
| MAP3K13_Danio_erio   | L | V | D | W | A | S | G | I | A | S | G | M | N | Y | L | H | L | H | K | - | - | - | I | I | H | R | D | L | K | S | P | N | V | L | V | T | Q |
| MAP3K15_Homo_sapiens | I | K | F | Y | T | K | Q | I | L | E | G | L | K | Y | L | H | E | N | Q | - | - | - | I | V | H | R | D | I | K | G | D | N | V | L | V | N | T |
| MAP3K15_Danio_erio   | I | I | F | Y | T | R | Q | I | L | E | G | I | R | Y | L | H | E | N | Q | - | - | - | I | V | H | R | D | I | K | G | D | N | V | L | V | N | T |
| MAP3K19_Homo_sapiens | F | C | K | Y | T | K | Q | I | L | Q | G | V | A | Y | L | H | E | N | C | - | - | - | V | V | H | R | D | I | K | G | N | N | V | M | L | M | P |
| MAP3K19_Danio_erio   | F | V | L | Y | S | Q | Q | I | L | E | G | V | A | Y | L | H | A | N | R | - | - | - | V | I | H | R | D | L | K | G | N | N | I | M | L | M | P |
| Trichoplax_adhaerens | A | I | G | W | M | L | Q | S | A | K | A | V | D | Y | L | H | S | M | T | P | K | P | L | M | H | R | D | L | K | P | L | N | M | L | M | F | N |
| TrispH2_010261       | A | I | G | W | M | L | Q | S | A | K | A | V | D | Y | L | H | S | M | T | P | K | P | L | M | H | R | D | L | K | P | L | N | M | L | M | F | N |

MAP3K, *T. sp. H2* & *T. adhaerens*

# MAPK (Pkinase domain, partial)

|                        |     |   |   |   |   |   |   |   |   |   |   |   |   |   |   |   |   |   |   |   |   |   |   |   |   |   |   |   |   |   |   |   |   |   |   |   |   |   |   |   |   |   |   |   |   |   |   |   |   |   |   |   |   |   |   |   |   |   |   |   |   |   |   |   |   |   |   |   |   |   |   |   |   |   |   |   |   |   |   |   |   |   |   |   |   |   |   |   |   |   |   |   |   |   |   |   |   |   |   |
|------------------------|-----|---|---|---|---|---|---|---|---|---|---|---|---|---|---|---|---|---|---|---|---|---|---|---|---|---|---|---|---|---|---|---|---|---|---|---|---|---|---|---|---|---|---|---|---|---|---|---|---|---|---|---|---|---|---|---|---|---|---|---|---|---|---|---|---|---|---|---|---|---|---|---|---|---|---|---|---|---|---|---|---|---|---|---|---|---|---|---|---|---|---|---|---|---|---|---|---|---|---|
| MAPK1_Homo_sapiens     | 183 | L | T | E | Y | V | A | T | R | W | Y | R | A | P | E | I | M | L | N | S | K | G | Y | T | K | S | I | D | I | W | S | V | G | C | I | L | A | E | M | L | S | N | R | P | I | F | P | G | K | H | Y | L | D | Q | L | N | H | I | L | G | I | L | G | S | P | S | Q | E | D | L | N | C | I | I | N | L | K | A | R | N | Y | L | L | S | L | P | H | K | N | K | V | P | W | N | R | L | F | P | N |
| MAPK1_Danio_riero      | 192 | L | T | E | Y | V | A | T | R | W | Y | R | A | P | E | I | M | L | N | S | K | G | Y | T | K | S | I | D | I | W | S | V | G | C | I | L | A | E | M | L | S | N | R | P | I | F | P | G | K | H | Y | L | D | Q | L | N | H | I | L | G | I | L | G | S | P | S | Q | E | D | L | N | C | I | I | N | I | K | A | R | N | Y | L | L | S | L | P | L | R | S | K | V | P | W | N | R | L | F | P | N |
| MAPK1_Geospiza_fortis  | 143 | L | T | E | Y | V | A | T | R | W | Y | R | A | P | E | I | M | L | N | S | K | G | Y | T | K | S | I | D | I | W | S | V | G | C | I | L | A | E | M | L | S | N | R | P | I | F | P | G | K | H | Y | L | D | Q | L | N | H | I | L | G | I | L | G | S | P | S | Q | E | D | L | N | C | I | I | N | L | K | A | R | N | Y | L | L | S | L | P | H | K | N | K | V | P | W | N | R | L | F | P | N |
| MAPK3_Homo_sapiens     | 86  | L | T | E | Y | V | A | T | R | W | Y | R | A | P | E | I | M | L | N | S | K | G | Y | T | K | S | I | D | I | W | S | V | G | C | I | L | A | E | M | L | S | N | R | P | I | F | P | G | K | H | Y | L | D | Q | L | N | H | I | L | G | I | L | G | S | P | S | Q | E | D | L | N | C | I | I | N | M | K | A | R | N | Y | L | Q | S | L | P | S | K | T | K | V | A | W | A | K | L | F | P | K |
| MAPK3_Danio_riero      | 214 | L | T | E | Y | V | A | T | R | W | Y | R | A | P | E | I | M | L | N | S | K | G | Y | T | K | S | I | D | I | W | S | V | G | C | I | L | A | E | M | L | S | N | R | P | I | F | P | G | K | H | Y | L | D | Q | L | N | H | I | L | G | V | L | G | S | P | S | Q | D | D | L | N | C | I | I | N | M | K | A | R | N | Y | L | Q | S | L | P | Q | K | P | K | I | P | W | N | K | L | F | P | K |
| MAPK3_Geospiza_fortis  | 143 | L | T | E | Y | V | A | T | R | W | Y | R | A | P | E | I | M | L | N | S | K | G | Y | T | K | S | I | D | I | W | S | V | G | C | I | L | A | E | M | L | S | N | R | P | I | F | P | G | K | H | Y | L | D | Q | L | N | H | I | L | G | I | L | G | S | P | S | Q | E | D | L | N | C | I | I | N | L | K | A | R | N | Y | L | L | S | L | P | H | K | N | K | V | P | W | N | R | L | F | P | N |
| MAPK4_Homo_sapiens     | 184 | L | S | E | G | L | V | T | K | W | Y | R | S | P | R | L | L | S | P | N | N | Y | T | K | A | I | D | M | W | A | A | G | C | I | L | A | E | M | L | T | G | R | M | L | F | A | G | A | H | E | L | E | Q | M | Q | L | I | L | E | T | I | P | V | I | R | E | E | D | K | D | E | L | L | - | R | V | M | P | S | F | V | S | S | T | W | - | E | V | K | R | P | L | R | K | L | P | E |   |   |
| MAPK4_Danio_riero      | 183 | L | S | E | G | M | V | T | K | W | Y | R | S | P | R | L | L | S | P | N | N | Y | T | K | A | I | D | M | W | A | A | G | C | I | F | A | E | M | L | T | G | K | T | L | F | A | G | A | H | E | L | E | Q | M | Q | L | I | L | E | S | I | P | V | V | H | E | E | D | R | Q | E | L | L | - | S | V | I | P | V | Y | I | R | N | D | M | T | E | P | H | K | P | L | T | Q | L | P | G |   |   |
| MAPK6_Homo_sapiens     | 187 | L | S | E | G | L | V | T | K | W | Y | R | S | P | R | L | L | S | P | N | N | Y | T | K | A | I | D | M | W | A | A | G | C | I | F | A | E | M | L | T | G | K | T | L | F | A | G | A | H | E | L | E | Q | M | Q | L | I | L | E | S | I | P | V | V | H | E | E | D | R | Q | E | L | L | - | S | V | I | P | V | Y | I | R | N | D | M | T | E | P | H | K | P | L | T | Q | L | P | G |   |   |
| MAPK6_Danio_riero      | 187 | L | S | E | G | L | V | T | K | W | Y | R | S | P | R | L | L | S | P | N | N | Y | T | K | A | I | D | M | W | A | A | G | C | I | F | A | E | M | L | T | G | K | T | L | F | A | G | A | H | E | L | E | Q | M | Q | L | I | L | E | S | I | P | V | V | H | E | E | D | R | Q | E | L | L | - | N | V | I | P | V | Y | I | R | N | D | M | T | E | P | H | K | P | L | T | Q | L | P | G |   |   |
| MAPK6_Geospiza_fortis  | 187 | L | S | E | G | L | V | T | K | W | Y | R | S | P | R | L | L | S | P | N | N | Y | T | K | A | I | D | M | W | A | A | G | C | I | F | A | E | M | L | T | G | K | T | L | F | A | G | A | H | E | L | E | Q | M | Q | L | I | L | E | S | I | P | V | V | H | E | E | D | R | Q | E | L | L | - | N | V | I | P | V | Y | I | R | N | D | M | T | E | P | H | K | P | L | T | Q | L | P | G |   |   |
| MAPK7_Homo_sapiens     | 217 | M | T | E | Y | V | A | T | R | W | Y | R | A | P | E | L | M | L | S | L | H | E | Y | T | Q | A | I | D | L | W | S | V | G | C | I | F | G | E | M | L | A | R | R | Q | L | F | P | G | K | N | Y | V | H | Q | L | Q | L | I | M | M | V | L | G | T | P | S | P | A | V | I | Q | A | V | G | A | E | R | V | R | A | Y | I | Q | S | L | P | P | R | Q | P | V | P | W | E | T | V | Y | P | G |
| MAPK7_Danio_riero      | 243 | M | T | E | Y | V | A | T | R | W | Y | R | A | P | E | L | M | L | S | L | H | H | Y | S | L | A | I | D | L | W | S | V | G | C | I | F | G | E | M | L | G | R | R | Q | M | F | P | G | K | N | Y | V | H | Q | L | Q | L | I | L | S | V | L | G | T | P | P | E | S | I | V | G | S | I | G | S | D | R | V | R | S | Y | V | R | S | L | P | S | K | A | P | E | P | L | A | A | L | Y | P | Q |
| MAPK8_Homo_sapiens     | 181 | M | T | P | Y | V | V | T | R | Y | Y | R | A | P | E | V | I | L | G | - | M | G | Y | K | E | N | V | D | L | W | S | V | G | C | I | M | G | E | M | V | C | H | K | I | L | F | P | G | R | D | Y | I | D | Q | W | N | K | V | I | E | Q | L | G | T | P | C | P | E | F | M | K | K | L | Q | - | P | T | V | R | T | Y | V | E | N | R | P | K | Y | A | G | Y | S | F | E | K | L | F | P | D |
| MAPK8_Geospiza_fortis  | 181 | M | T | P | Y | V | V | T | R | Y | Y | R | A | P | E | V | I | L | G | - | M | G | Y | K | E | N | V | D | L | W | S | V | G | C | I | M | G | E | M | V | C | H | K | I | L | F | P | G | R | D | Y | I | D | Q | W | N | K | V | I | E | Q | L | G | T | P | C | P | E | F | M | K | K | L | Q | - | P | T | V | R | T | Y | V | E | N | R | P | K | Y | A | G | Y | S | F | E | K | L | F | P | D |
| MAPK9_Homo_sapiens     | 181 | M | T | P | Y | V | V | T | R | Y | Y | R | A | P | E | V | I | L | G | - | M | G | Y | K | E | N | V | D | I | W | S | V | G | C | I | M | G | E | L | V | K | G | C | V | I | F | Q | G | T | D | H | I | D | Q | W | N | K | V | I | E | Q | L | G | T | P | S | A | E | F | M | K | K | L | Q | - | P | T | V | R | N | Y | V | E | N | R | P | K | Y | P | G | I | K | F | E | E | L | F | P | D |
| MAPK9_Geospiza_fortis  | 181 | M | T | P | Y | V | V | T | R | Y | Y | R | A | P | E | V | I | L | G | - | M | G | Y | K | E | N | V | D | I | W | S | V | G | C | I | M | G | E | L | V | K | G | C | V | I | F | Q | G | T | D | H | I | D | Q | W | N | K | V | I | E | Q | L | G | T | P | S | A | E | F | M | K | K | L | Q | - | P | T | V | R | N | Y | V | E | N | R | P | K | Y | P | G | I | K | F | E | E | L | F | P | D |
| MAPK10_Homo_sapiens    | 181 | M | T | P | Y | V | V | T | R | Y | Y | R | A | P | E | V | I | L | G | - | M | G | Y | K | E | N | V | D | I | W | S | V | G | C | I | M | G | E | M | V | R | H | K | I | L | F | P | G | R | D | Y | I | D | Q | W | N | K | V | I | E | Q | L | G | T | P | C | P | E | F | M | K | K | L | Q | - | P | T | V | R | N | Y | V | E | N | R | P | K | Y | A | G | L | T | F | P | K | L | F | P | D |
| MAPK10_Danio_riero     | 181 | M | T | P | Y | V | V | T | R | Y | Y | R | A | P | E | V | I | L | G | - | M | G | Y | K | E | N | V | D | I | W | S | V | G | C | I | M | G | E | M | V | R | H | K | I | L | F | P | G | R | D | Y | I | D | Q | W | N | K | V | I | E | Q | L | G | T | P | C | P | E | F | M | K | K | L | Q | - | P | T | V | R | N | Y | V | E | N | R | P | K | Y | A | G | L | T | F | P | K | L | F | P | D |
| MAPK11_Homo_sapiens    | 222 | M | T | P | Y | V | V | T | R | Y | Y | R | A | P | E | V | I | L | G | - | M | G | Y | K | E | N | V | D | I | W | S | V | G | C | I | M | G | E | M | V | R | H | K | I | L | F | P | G | R | D | Y | I | D | Q | W | N | K | V | I | E | Q | L | G | T | P | S | P | E | F | M | K | K | L | Q | - | P | T | V | R | N | Y | V | E | N | R | P | K | Y | A | G | L | T | F | P | K | L | F | P | D |
| MAPK11_Danio_riero     | 212 | M | T | G | Y | V | A | T | R | W | Y | R | A | P | E | I | M | L | N | W | M | H | Y | N | Q | T | V | D | I | W | S | V | G | C | I | M | A | E | L | L | Q | G | K | A | L | F | P | G | S | D | Y | I | D | Q | L | K | R | I | M | E | V | V | G | T | P | S | P | E | V | L | A | K | I | S | S | E | H | A | R | T | Y | I | Q | S | L | P | P | M | P | Q | K | D | L | S | S | I | F | R | G |
| MAPK11_Geospiza_fortis | 178 | M | T | G | Y | V | A | T | R | W | Y | R | A | P | E | I | M | L | N | W | M | H | Y | N | Q | T | V | D | I | W | S | V | G | C | I | M | G | E | L | L | K | G | K | V | L | F | P | G | N | D | Y | I | D | Q | L | K | R | I | M | E | V | V | G | T | P | T | P | D | V | L | K | K | I | S | S | E | H | A | Q | K | Y | I | Q | S | L | P | H | M | P | Q | Q | D | L | G | K | I | F | R | G |
| MAPK12_Homo_sapiens    | 139 | M | T | G | Y | V | A | T | R | W | Y | R | A | P | E | I | M | L | N | W | M | H | Y | N | Q | T | V | D | I | W | S | V | G | C | I | M | A | E | L | L | K | G | K | A | L | F | P | G | N | D | Y | I | D | Q | L | K | R | I | M | E | V | V | G | T | P | S | S | E | L | L | K | K | I | S | S | E | H | A | R | K | Y | I | E | S | L | P | H | M | P | Q | Q | D | L | K | A | V | F | R | G |
| MAPK12_Danio_riero     | 287 | M | T | G | Y | V | V | T | R | W | Y | R | A |   |   |   |   |   |   |   |   |   |   |   |   |   |   |   |   |   |   |   |   |   |   |   |   |   |   |   |   |   |   |   |   |   |   |   |   |   |   |   |   |   |   |   |   |   |   |   |   |   |   |   |   |   |   |   |   |   |   |   |   |   |   |   |   |   |   |   |   |   |   |   |   |   |   |   |   |   |   |   |   |   |   |   |   |   |   |



# NFKB – Ankyrin repeats

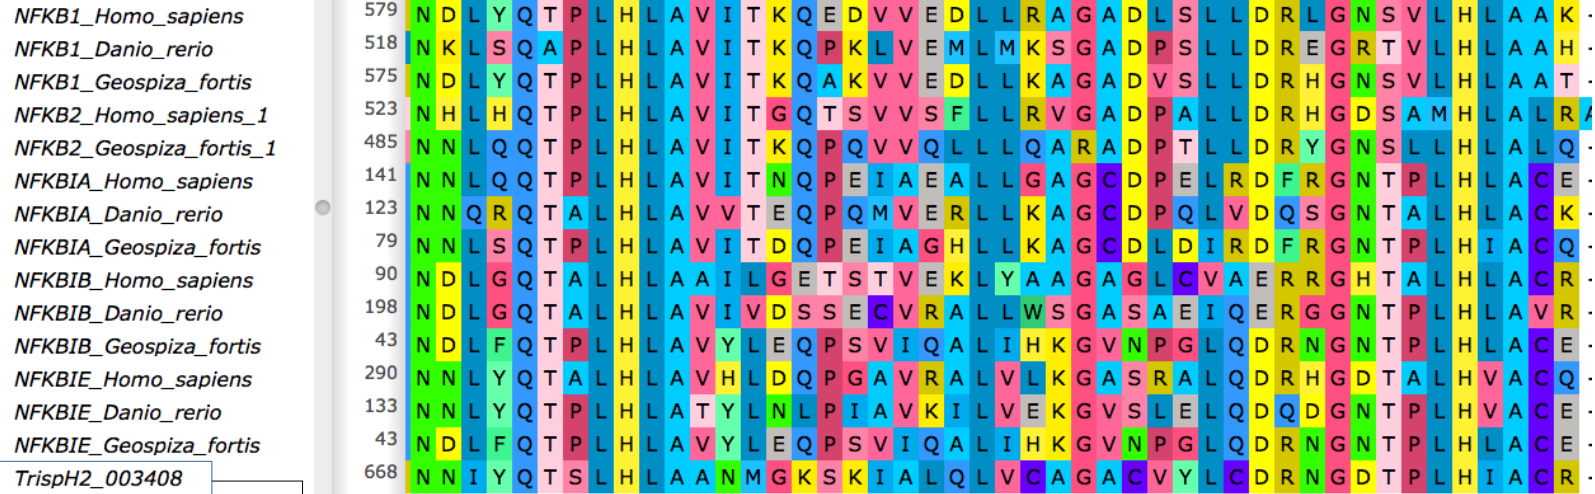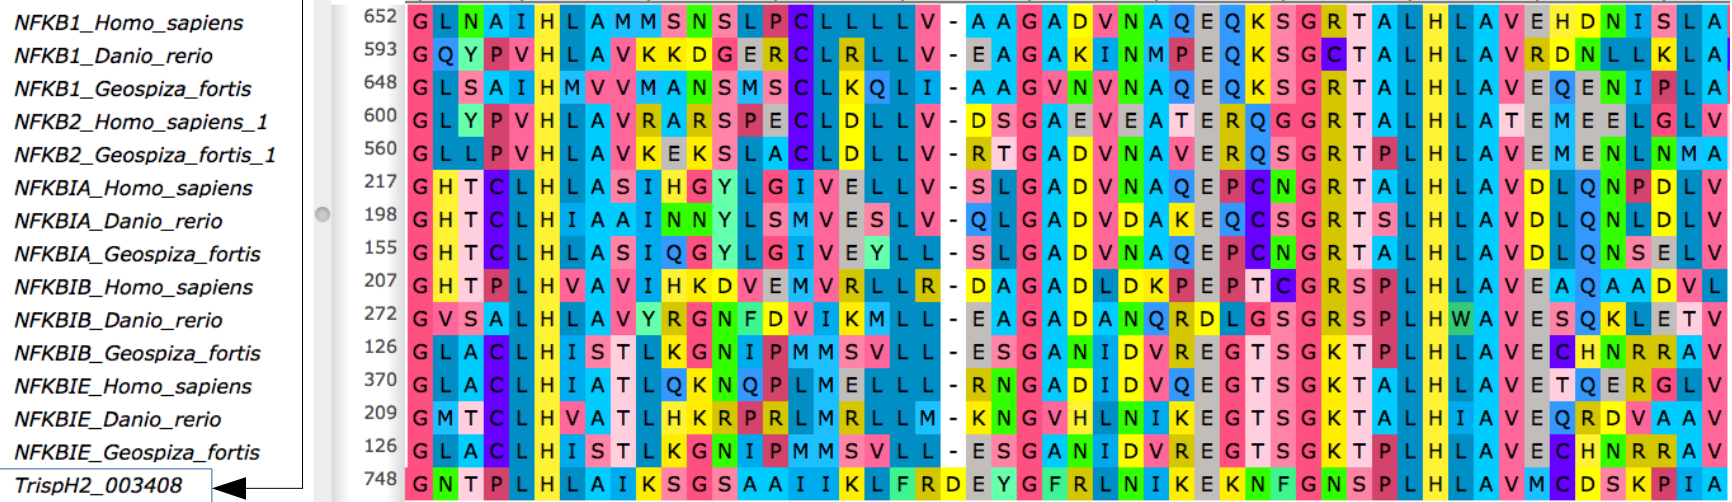

▶ NFKB, *T. sp. H2*



# Pellino domain (amino end)

|                              |     |   |   |   |   |   |   |   |   |   |   |   |   |   |   |   |   |   |   |   |   |   |   |   |   |   |   |   |   |   |   |   |   |   |   |   |   |   |   |   |   |   |   |   |   |   |   |   |   |   |   |   |   |   |   |   |   |   |   |   |   |   |   |   |   |   |   |   |   |   |   |   |   |   |   |   |   |   |   |   |   |   |   |   |   |   |   |   |   |   |   |   |   |   |   |   |   |   |   |   |   |   |   |   |   |
|------------------------------|-----|---|---|---|---|---|---|---|---|---|---|---|---|---|---|---|---|---|---|---|---|---|---|---|---|---|---|---|---|---|---|---|---|---|---|---|---|---|---|---|---|---|---|---|---|---|---|---|---|---|---|---|---|---|---|---|---|---|---|---|---|---|---|---|---|---|---|---|---|---|---|---|---|---|---|---|---|---|---|---|---|---|---|---|---|---|---|---|---|---|---|---|---|---|---|---|---|---|---|---|---|---|---|---|---|
| <i>PELI1_Homo_sapiens</i>    | [ 1 | V | L | G | Y | N | G | S | L | P | N | G | D | R | G | R | R | K | S | R | F | A | L | F | K | R | P | K | A | N | G | V | K | P | S | T | V | H | I | A | C | T | P | Q | A | A | K | A | I | - | S | N | K | D | - | Q | H | S | I | S | Y | T | L | S | R | A | Q | T | V | V | V | E | Y | T | H | D | S | N | T | D | M | F | Q | I | G | R | S | T | E | S | P | I | D | F | V | V | T | D | T | V | P | G | S | S | N |
| <i>PELI1_Danio_erio</i>      | [ 1 | V | L | G | Y | N | G | S | L | P | N | G | D | R | G | R | R | K | S | R | F | A | L | F | K | R | P | K | S | N | G | V | K | P | S | T | V | H | V | A | C | T | P | Q | A | A | K | A | I | - | S | N | K | D | - | Q | H | S | I | S | Y | T | L | S | R | V | Q | T | V | V | V | E | Y | T | Q | D | S | N | T | D | M | F | Q | I | G | R | S | T | E | S | P | I | D | F | V | V | T | D | T | V | P | G | S | S | N |
| <i>PELI1_Geospiza_fortis</i> | [ 1 | V | L | G | Y | N | G | S | L | P | N | G | D | R | G | R | R | K | S | R | F | A | L | F | K | R | P | K | A | N | G | V | K | P | S | T | V | H | I | A | C | T | P | Q | A | A | K | A | I | - | S | N | K | D | - | Q | H | S | I | S | Y | T | L | S | R | A | Q | T | V | V | V | E | Y | T | H | D | S | N | T | D | M | F | Q | I | G | R | S | T | E | S | P | I | D | F | V | V | T | D | T | V | P | G | S | S | N |
| <i>PELI2_Homo_sapiens</i>    | [ 1 | V | L | G | Y | N | G | A | L | P | N | G | D | R | G | R | R | K | S | R | F | A | L | Y | K | R | P | K | A | N | G | V | K | P | S | T | V | H | V | I | S | T | P | Q | A | S | K | A | I | - | S | C | K | G | - | Q | H | S | I | S | Y | T | L | S | R | N | Q | T | V | V | V | E | Y | T | H | D | K | D | T | D | M | F | Q | V | G | R | S | T | E | S | P | I | D | F | V | V | T | D | T | I | S | G | S | N | T |
| <i>PELI2_Danio_erio</i>      | [ 1 | V | L | G | Y | N | G | S | L | P | N | G | D | R | G | R | R | K | S | R | F | A | L | Y | K | R | A | K | A | N | G | V | K | P | S | T | V | H | I | L | N | T | P | Q | A | S | K | A | V | - | N | C | K | G | - | Q | H | S | I | S | Y | T | L | S | R | N | Q | T | V | V | V | E | Y | S | H | D | K | D | T | D | M | F | Q | I | G | R | S | T | E | G | P | I | D | F | V | V | T | D | T | V | S | G | G | E | S |
| <i>PELI2_Geospiza_fortis</i> | [ 1 | L | S | R | Y | N | G | S | L | P | N | G | D | R | G | R | R | K | S | R | F | A | L | Y | R | R | S | R | A | S | G | V | K | P | S | S | V | H | V | I | S | T | P | Q | T | S | K | A | I | - | S | S | K | G | - | H | H | S | I | S | Y | T | L | S | R | T | Q | T | V | I | V | E | Y | I | H | R | D | T | D | M | F | Q | V | G | R | S | T | E | S | P | I | D | F | V | V | T | D | T | I | S | G | Y | N | N |   |
| <i>PELI3_Homo_sapiens</i>    | [ 1 | V | L | G | Y | N | G | C | L | A | S | G | D | K | G | R | R | R | S | R | L | A | L | S | R | R | S | H | A | N | G | V | K | P | D | V | M | H | H | I | S | T | P | L | V | S | K | A | L | - | S | N | R | G | - | Q | H | S | I | S | Y | T | L | S | R | S | H | S | V | I | V | E | Y | T | H | D | S | D | T | D | M | F | Q | I | G | R | S | T | E | N | M | I | D | F | V | V | T | D | T | S | P | G | G | G | A |
| <i>PELI3_Danio_erio</i>      | [ 1 | V | L | G | H | N | G | S | L | A | S | G | D | K | G | R | R | R | S | R | L | A | L | Y | K | R | P | K | A | N | G | V | K | P | D | V | I | H | N | V | S | T | P | L | V | S | K | A | L | - | S | N | K | S | - | Q | H | S | I | S | Y | T | L | S | R | S | H | S | V | I | V | E | Y | T | H | D | P | N | T | D | M | F | Q | I | G | R | S | T | E | S | M | I | D | F | V | V | T | D | T | A | S | S | G | G | A |
| <i>PELI3_Geospiza_fortis</i> | [ 1 | V | L | G | Y | N | G | S | L | P | N | G | D | R | G | R | R | K | S | R | F | A | L | F | K | R | P | K | A | N | G | V | K | P | S | T | V | H | I | A | C | T | P | Q | A | A | K | A | I | - | S | N | K | D | - | Q | H | S | I | S | Y | T | L | S | R | A | Q | T | V | V | V | E | Y | T | H | D | S | N | T | D | M | F | Q | I | G | R | S | T | E | S | P | I | D | F | V | V | T | D | T | V | P | G | S | S | N |
| <i>Trichoplax adhaerens</i>  | 7   | V | I | G | Y | N | G | K | L | P | T | G | N | C | G | K | L | R | S | K | F | E | L | K | K | K | I | A | N | S | V | K | A | S | V | K | Y | T | I | K | A | - | E | V | D | K | V | I | L | Y | Y | Q | S | G | V | I | D | F | V | Y | C | V | R | Y | G | H | F | S | A | V | T | Y | E | F | D | E | D | M | D | M | Y | Q | I | G | R | A | C | D | D | F | V | D | F | Q | V | L | D | T | V | P | G | A | E | T |   |
| <i>TrispH2_002428</i>        | 55  | V | I | G | Y | N | G | K | L | P | T | G | N | C | G | K | L | R | S | K | F | E | L | K | K | K | I | A | N | S | V | K | A | S | V | K | Y | T | I | K | A | - | E | V | D | K | R | I | - | Y | D | R | S | - | - | - | - | - | - | V | Y | C | V | R | Y | G | N | F | S | A | V | T | Y | E | F | D | E | D | M | D | M | Y | Q | I | G | R | A | C | D | D | F | V | D | F | Q | V | L | D | T | V | P | G | A | E | T |

▶ Pellino, *T. sp. H2* & *T. adhaerens*



# DUSP family (DSPc domain, partial)

- DUSP10\_Danio\_erio\_1
- DUSP10\_Geospiza\_fortis\_1
- DUSP12\_Homo\_sapiens\_1
- DUSP12\_Danio\_erio\_1
- DUSP13\_Homo\_sapiens\_1
- DUSP13\_Geospiza\_fortis\_1
- DUSP14\_Homo\_sapiens\_1
- DUSP14\_Danio\_erio\_1
- DUSP14\_Geospiza\_fortis\_1
- DUSP15\_Homo\_sapiens\_1
- DUSP15\_Danio\_erio\_1
- DUSP15\_Geospiza\_fortis\_1
- DUSP16\_Homo\_sapiens\_1
- DUSP16\_Danio\_erio\_1
- DUSP16\_Geospiza\_fortis\_1
- DUSP18\_Latimeria\_chalumnae\_1
- DUSP19\_Homo\_sapiens\_1
- DUSP19\_Danio\_erio\_1
- DUSP19\_Geospiza\_fortis\_1
- DUSP22\_Homo\_sapiens\_1
- DUSP22\_Danio\_erio\_1
- DUSP22\_Geospiza\_fortis\_1
- STYX\_Homo\_sapiens
- STYX\_Danio\_erio
- STYX\_Geospiza\_fortis
- STYX\_Trichoplax\_adhaerens
- TrispH2\_000711
- TrispH2\_000712

|     |   |   |   |   |   |   |   |   |   |   |   |   |   |   |   |   |   |   |   |   |   |   |   |   |   |   |   |   |   |   |   |   |   |   |   |   |   |   |   |   |   |   |   |   |   |   |   |   |   |   |   |   |   |   |   |   |   |   |   |   |   |   |   |   |   |   |   |   |   |   |   |   |   |   |   |   |   |   |   |   |   |   |   |   |   |   |   |   |   |   |   |
|-----|---|---|---|---|---|---|---|---|---|---|---|---|---|---|---|---|---|---|---|---|---|---|---|---|---|---|---|---|---|---|---|---|---|---|---|---|---|---|---|---|---|---|---|---|---|---|---|---|---|---|---|---|---|---|---|---|---|---|---|---|---|---|---|---|---|---|---|---|---|---|---|---|---|---|---|---|---|---|---|---|---|---|---|---|---|---|---|---|---|---|---|
| 353 | T | D | S | N | K | Q | N | L | R | Q | Y | F | E | E | A | F | E | F | I | E | E | A | H | - | Q | A | G | R | G | L | L | I | H | C | Q | A | G | V | S | R | S | A | T | I | V | I | A | Y | L | M | K | H | T | W | M | T | M | T | D | A | Y | K | F | V | K | S | R | R | P | I | I | S | P | N | L | N | F | M | G | Q | L | L | E | F | E | E | D | L | N | N | G |
| 375 | T | D | S | N | K | Q | N | L | R | Q | Y | F | E | E | A | F | E | F | I | E | E | A | H | - | Q | C | G | K | G | L | L | I | H | C | Q | A | G | V | S | R | S | A | T | I | V | I | A | Y | L | M | K | H | T | R | M | T | M | T | D | A | Y | K | F | V | K | G | K | R | P | I | I | S | P | N | L | N | F | M | G | Q | L | L | E | F | E | E | D | L | N | N | G |
| 90  | L | D | K | P | E | T | D | L | L | S | H | L | D | R | C | V | A | F | I | G | Q | A | R | - | A | E | G | R | A | V | L | V | H | C | H | A | G | V | S | R | S | V | A | I | I | T | A | F | L | M | K | T | D | Q | L | P | F | E | K | A | Y | E | K | L | Q | I | L | K | P | E | A | K | M | N | E | G | F | E | W | Q | L | K | L | Y | Q | A | M | G | Y | E | V |
| 63  | L | D | D | E | S | T | D | L | L | S | R | L | D | D | C | T | S | F | I | S | Q | A | D | - | S | K | S | A | A | V | L | V | H | C | H | V | Q | S | R | S | A | A | V | V | T | A | Y | L | M | K | T | Q | H | L | T | L | Q | E | A | Y | S | K | L | Q | N | I | K | P | D | V | K | M | N | E | E | F | L | D | Q | L | A | L | Y | D | L | M | D | C | K | V |   |
| 233 | D | D | N | P | F | F | D | L | S | V | Y | F | L | P | V | A | R | Y | I | R | A | A | L | S | V | P | Q | G | R | V | L | V | H | C | A | M | G | V | S | R | S | A | T | L | V | L | A | F | L | M | I | C | E | N | M | T | L | V | E | A | I | Q | T | V | Q | A | H | R | - | N | I | C | P | N | S | G | F | L | R | Q | L | Q | V | L | D | N | - | - | - | - |   |
| 110 | E | D | N | P | N | F | D | L | S | I | H | F | Y | P | V | A | H | Y | I | R | E | A | L | N | S | P | R | G | K | V | L | V | H | C | A | M | G | I | S | R | S | A | T | L | V | L | A | F | L | M | I | C | E | G | L | S | L | T | T | A | I | Q | T | V | R | S | H | R | - | G | I | C | P | N | S | G | F | L | Q | Q | L | R | D | L | D | L | - | - | - | - |   |
| 76  | A | D | M | P | H | A | P | I | G | L | Y | F | D | T | V | A | D | K | I | H | S | V | S | - | R | K | H | G | A | T | L | V | H | C | A | A | G | V | S | R | S | A | T | L | C | I | A | Y | L | M | K | F | H | N | V | C | L | L | E | A | Y | N | W | V | K | A | R | R | P | V | I | R | P | N | V | G | F | W | R | Q | L | I | D | Y | E | R | Q | L | F | G | K |
| 99  | A | D | M | P | H | S | P | I | S | L | Y | F | D | S | V | A | D | K | I | H | S | V | G | - | R | K | R | G | A | V | L | V | H | C | A | A | G | V | S | R | S | A | S | L | C | L | A | Y | L | M | K | Y | H | R | V | S | L | A | E | A | H | A | W | V | K | A | R | R | P | V | I | R | P | N | G | G | F | W | R | Q | L | I | E | Y | E | R | K | L | F | G | R |
| 76  | A | D | M | P | N | A | P | I | S | L | Y | F | D | S | V | A | D | K | I | Q | S | V | A | - | R | K | H | G | A | A | L | V | H | C | A | A | G | V | S | R | S | A | T | L | C | I | A | F | L | M | K | H | H | K | V | S | L | L | E | A | Y | S | W | V | K | A | R | R | P | V | I | R | P | N | V | G | F | W | R | Q | L | I | D | Y | E | R | K | L | F | G | K |
| 78  | A | D | T | P | E | V | P | I | K | K | H | F | K | E | C | I | N | F | I | H | C | C | R | - | L | N | G | G | N | C | L | V | H | C | F | A | G | I | S | R | S | T | T | I | V | T | A | Y | V | M | T | V | T | G | L | G | W | R | D | V | L | E | A | I | K | A | T | R | P | I | A | N | P | N | P | G | F | R | Q | Q | L | E | E | F | G | W | A | S | S | Q | K |
| 56  | A | D | S | P | T | Q | N | L | I | Q | H | F | R | Q | S | I | A | F | I | H | Q | S | R | - | L | K | G | E | G | C | L | V | H | C | L | A | G | V | S | R | S | V | T | L | V | V | A | Y | I | M | T | V | T | T | L | G | W | Q | E | A | L | A | A | V | K | I | A | R | P | C | A | S | P | N | T | G | F | Q | N | Q | L | Q | E | F | Q | T | G | E | L | Q | Q |
| 75  | P | D | T | P | E | A | N | I | K | R | H | F | K | E | C | I | S | F | I | H | Q | C | R | - | L | H | G | G | N | C | L | V | H | C | L | A | G | I | S | R | S | T | T | V | V | V | A | Y | V | M | V | V | T | E | L | S | C | Q | E | V | L | D | A | I | R | T | I | R | P | V | A | N | P | N | P | G | F | R | Q | Q | L | A | E | F | S | G | S | A | A | R | K |
| 212 | N | D | S | F | C | E | K | I | L | P | W | L | D | K | S | V | D | F | I | E | K | A | K | - | A | S | N | G | C | V | L | V | H | C | L | A | G | I | S | R | S | A | T | I | A | I | A | Y | I | M | K | R | M | D | M | S | L | D | E | A | Y | R | F | V | K | E | K | R | P | T | I | S | P | N | F | N | F | L | G | Q | L | L | D | F | E | K | N | L | K | S | - |
| 212 | N | D | S | F | C | E | K | I | L | P | W | L | D | R | S | V | E | F | I | E | K | A | K | - | A | S | N | A | R | V | L | V | H | C | L | A | G | I | S | R | S | A | T | I | A | I | A | Y | I | M | K | R | M | D | M | T | L | D | E | A | Y | R | F | V | K | E | K | R | P | T | I | S | P | N | F | N | F | L | G | Q | L | L | D | F | E | K | N | L | K | S | - |
| 214 | N | D | S | F | C | E | K | I | L | P | W | L | D | K | S | V | D | F | I | E | K | A | K | - | A | S | N | G | H | V | L | V | H | C | L | A | G | I | S | R | S | A | T | I | A | I | A | Y | I | M | K | R | M | D | M | S | L | D | E | A | Y | R | F | V | K | E | K | R | P | T | I | S | P | N | F | N | F | L | G | Q | L | L | D | F | E | K | K | L | K | N | Q |
| 81  | P | D | L | P | H | S | P | L | S | L | Y | F | D | T | V | A | D | K | I | H | L | T | G | - | R | K | N | G | R | T | L | V | H | C | V | A | G | V | S | R | S | A | S | L | C | M | A | Y | L | M | K | Y | H | K | L | S | L | L | E | A | H | E | W | V | K | A | R | R | P | V | I | R | P | N | V | G | F | W | R | Q | L | I | D | Y | E | K | K | L | F | G | K |
| 116 | L | D | L | P | E | T | N | I | L | S | Y | F | P | E | C | F | E | F | I | E | E | A | K | - | R | K | D | G | V | V | L | V | H | C | N | A | G | V | S | R | A | A | A | I | V | I | G | F | L | M | N | S | E | Q | T | S | F | T | S | A | F | S | L | V | K | N | A | R | P | S | I | C | P | N | S | G | F | M | E | Q | L | R | T | Y | Q | E | G | K | E | S | N |
| 115 | L | D | Q | P | D | T | I | S | H | I | K | E | C | A | Q | F | I | D | E | A | K | - | N | E | K | G | V | V | L | V | H | C | N | S | G | V | S | R | S | V | S | V | I | G | L | M | L | K | E | N | Q | G | F | G | D | T | F | A | L | V | K | S | A | R | P | A | S | C | P | N | P | G | F | M | E | Q | L | K | N | F | K | P | Q | - | - | - | - |   |   |   |   |
| 76  | L | D | L | P | E | T | D | I | T | S | Y | F | P | E | C | F | E | F | I | E | K | A | R | - | I | Q | D | G | V | V | L | V | H | C | N | A | G | V | S | R | A | A | A | V | I | G | F | L | M | N | S | E | R | L | S | F | A | R | A | F | S | L | V | K | N | A | R | P | A | A | C | P | N | P | G | F | M | E | Q | L | H | K | Y | Q | E | - | - | - | - |   |   |
| 248 | L | P | S | A | S | V | S | W | T | R | H | F | K | E | S | I | K | F | I | H | E | C | R | - | L | R | G | E | S | C | L | V | H | C | L | A | G | V | S | R | S | V | T | L | V | I | A | Y | I | M | T | V | T | D | F | G | W | E | D | A | L | H | T | V | R | A | G | R | S | C | A | N | P | N | V | G | F | Q | R | Q | L | Q | E | F | E | K | H | E | V | H | Q |
| 56  | A | D | S | P | T | Q | N | L | I | Q | H | F | R | Q | S | I | A | F | I | H | Q | S | R | - | L | K | G | E | G | C | L | V | H | C | L | A | G | V | S | R | S | V | T | L | V | V | A | Y | I | M | T | V | T | T | L | G | W | Q | E | A | L | A | A | V | K | I | A | R | P | C | A | S | P | N | T | G | F | Q | N | Q | L | Q | E | F | Q | T | G | E | L | Q | Q |
| 99  | L | N | S | R | N | S | A | R | A | R | H | F | R | E | S | I | K | F | I | H | E | C | R | - | L | T | G | E | G | C | L | V | H | C | L | A | G | V | S | R | S | V | T | L | V | V | A | Y | I | M | T | I | T | D | F | G | W | E | D | A | L | S | V | V | R | A | A | R | S | C | A | N | P | N | M | G | F | Q | R | Q | L | Q | E | F | E | K | H | D | V | D | Q |
| 84  | A | D | N | P | V | E | N | I | I | R | F | F | P | M | T | K | E | F | I | D | G | S | L | - | Q | M | G | G | K | V | L | V | H | G | N | A | G | I | S | R | S | A | A | F | V | I | A | Y | I | M | E | T | F | G | M | K | Y | R | D | A | F | A | Y | V | Q | E | R | R | F | C | I | N | P | N | A | G | F | V | H | Q | L | Q | E | Y | E | A | I | - | - | - | - |
| 85  | A | D | N | P | V | E | N | I | I | R | Y | F | P | T | T | K | E | F | I | D | G | C | L | - | E | T | G | G | K | V | L | V | H | G | N | A | G | I | S | R | S | A | A | L | V | I | A | Y | L | M | E | T | F | G | V | K | Y | R | D | A | F | S | H | V | Q | E | R | R | F | C | I | N | P | N | V | G | F | V | H | Q | L | Q | E | Y | E | A | I | - | - | - | - |
| 71  | A | D | N | P | V | E | N | I | I | R | F | F | P | M | T | K | E | F | I | D | G | S | L | - | Q | S | G | G | K | V | L | V | H | G | N | A | G | I | S | R | S | A | A | L | V | I | A | Y | I | M | E | T | F | G | V | K | Y | R | D | A | F | T | Y | V |   |   |   |   |   |   |   |   |   |   |   |   |   |   |   |   |   |   |   |   |   |   |   |   |   |   |   |
