# Supplementary material for: Innate immunity in the simplest animals – placozoans
Source: PubMed Central journal article supplement (PMC6321704; doi:10.1186/s12864-018-5377-3), 2019-01-05
Supplement: 12864_2018_5377_MOESM5_ESM.pdf [file 12864_2018_5377_MOESM5_ESM.pdf]

Strict 90% Consensus

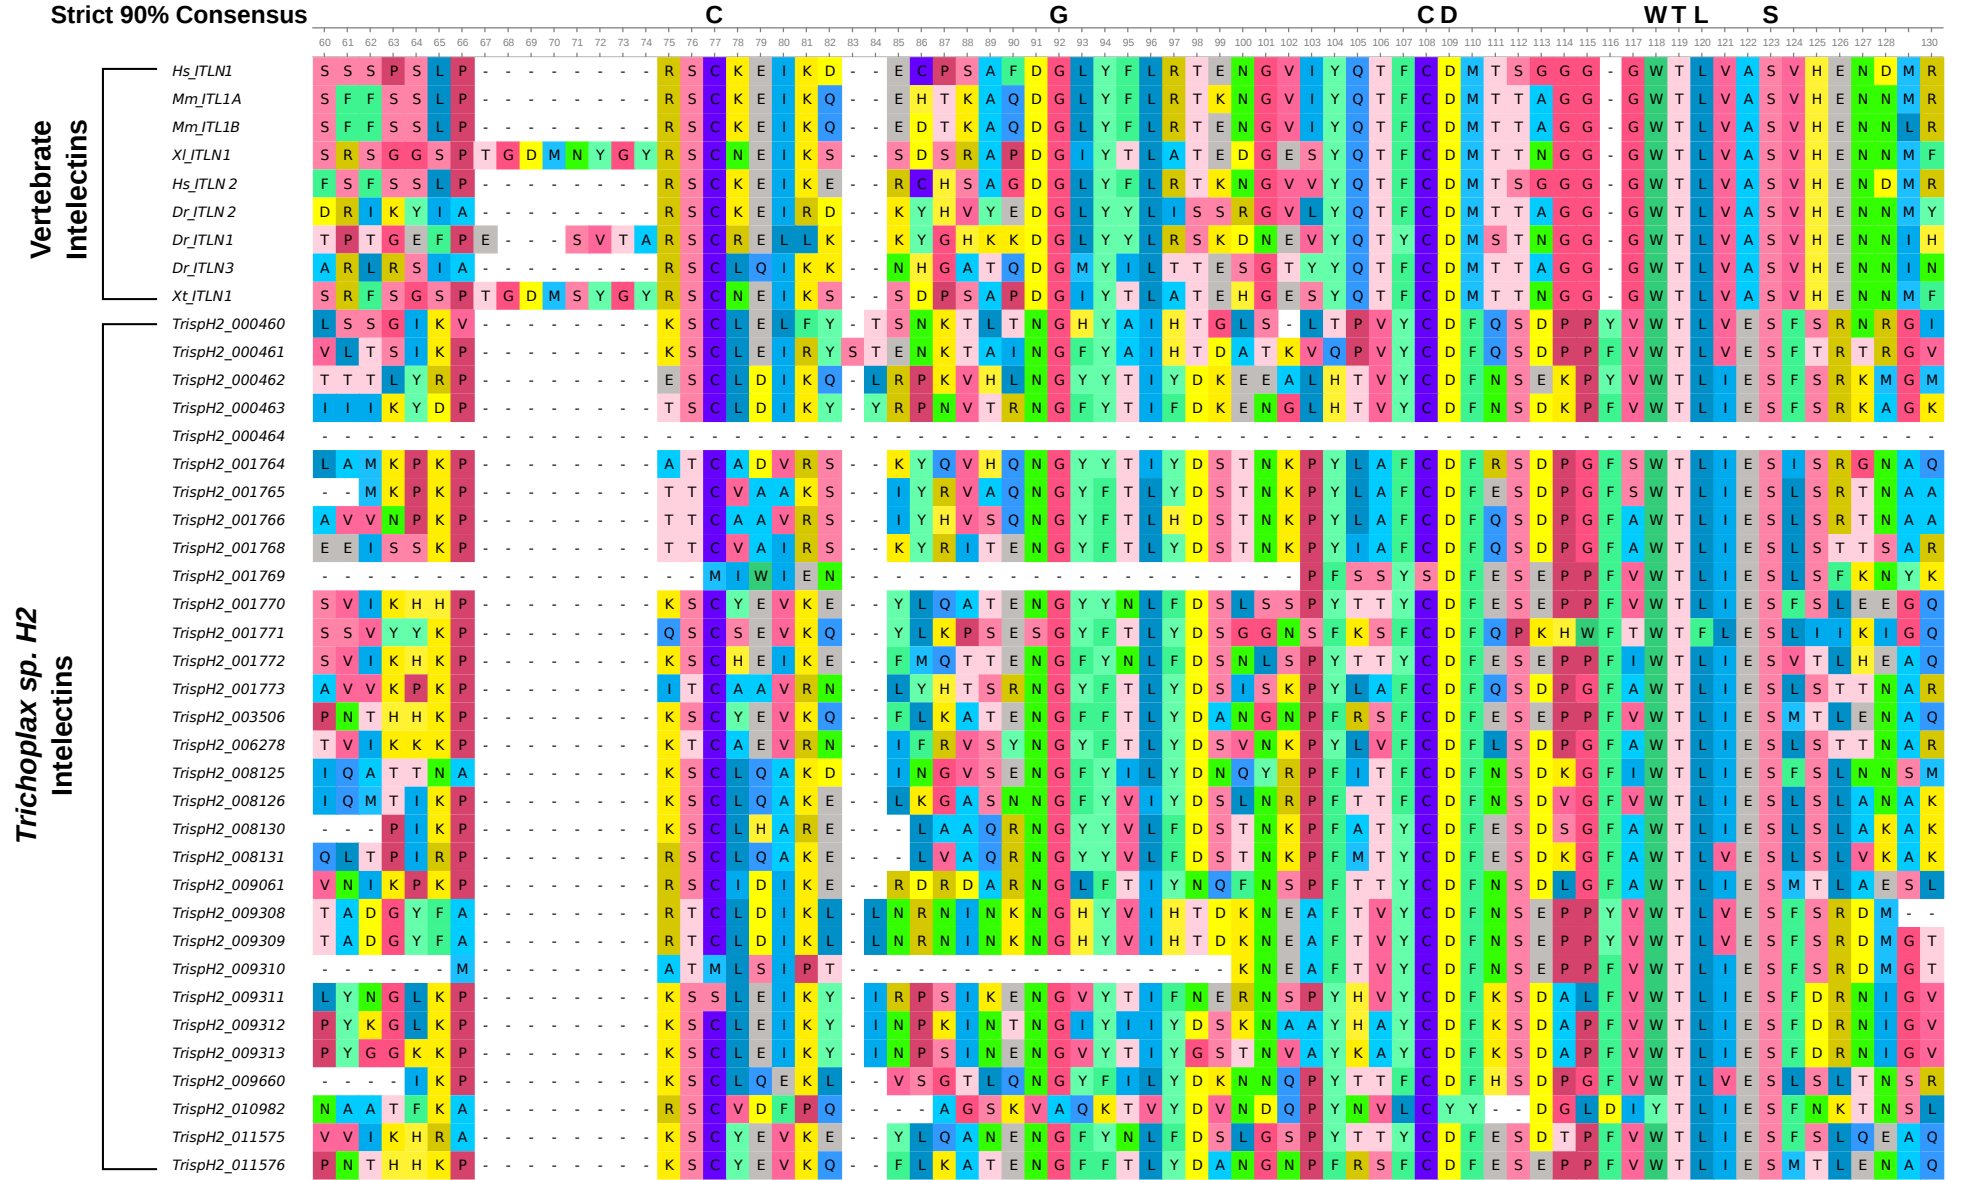

**Figure S2** Vertebrate and placozoan intelectins aligned in the region of the fibrinogen-related domain (FReD) of placozoan intelectins. The identified FReDs in placozoan intelectins are shorter than in vertebrate intelectins, probably due to the divergence from canonical domain models, and restricted to the N-terminal portion of the proteins. Only two of the ten conserved cysteine residues in placozoan intelectins are contained in this part. Highly conserved residues are indicated by a strict 90% consensus at the top. Note that TrispH2\_000464 is truncated and contains no sequence information in this part of the alignment. See also Additional file 4: Dataset S3C and for the complete alignment Additional file 6: Dataset S4.
